# Supplementary material for: From Cu(i) and Cu(i)–Cu(ii) mixed-valence clusters to 2D Cu(ii) and Cu(i) coordination polymers supported by a flexible bis-tetrazole organosulfur ligand
Source: Royal Society of Chemistry journal article supplement (doi:10.1039/d3dt01556d), 2023-01-01
Supplement: d3dt01556d1.pdf [file d3dt01556d1.pdf]

# From Cu(I) and Cu(I)-Cu(II) mixed-valence clusters to 2D Cu(II) and Cu(I) coordination polymers supported by a flexible bis-tetrazole organosulfur ligand.

Olaya Gómez-Paz<sup>a,b</sup>, Rosa Carballo<sup>a,b\*</sup>, Ana B. Lago<sup>c\*</sup>, Inmaculada Prieto<sup>b,d</sup>, Ezequiel M. Vázquez-López<sup>a,b</sup>.

**a** Universidade de Vigo, Departamento de Química Inorgánica, Facultade de Química, 36310 Vigo, Spain

**b** Metallosupramolecular Chemistry Group, Galicia Sur Health Research Institute (IIS Galicia Sur). SERGAS-UVIGO, Galicia, Spain

**c** Departamento de Química, Facultad de Ciencias, Sección Química Inorgánica, Universidad de la Laguna, 38206 La Laguna, Spain

**d** Universidade de Vigo, Departamento de Química Física, Facultade de Química, 36310 Vigo, Spain

\*Correspondence e-mail: [alagobla@ull.edu.es](mailto:alagobla@ull.edu.es)

## Supplementary material

| <b>Contents:</b>                                         | <b>Page</b> |
|----------------------------------------------------------|-------------|
| 1. Characterization                                      | 2           |
| 2. Crystallography                                       | 8           |
| 3. Hirshfeld surface analysis                            | 14          |
| 4. Thermal stability                                     | 16          |
| 5. Water stability                                       | 20          |
| 6. Reactivity of <b>2</b>                                | 23          |
| 7. Redox behaviour of compounds <b>2</b><br>and <b>3</b> | 25          |

---

## 1. Characterization

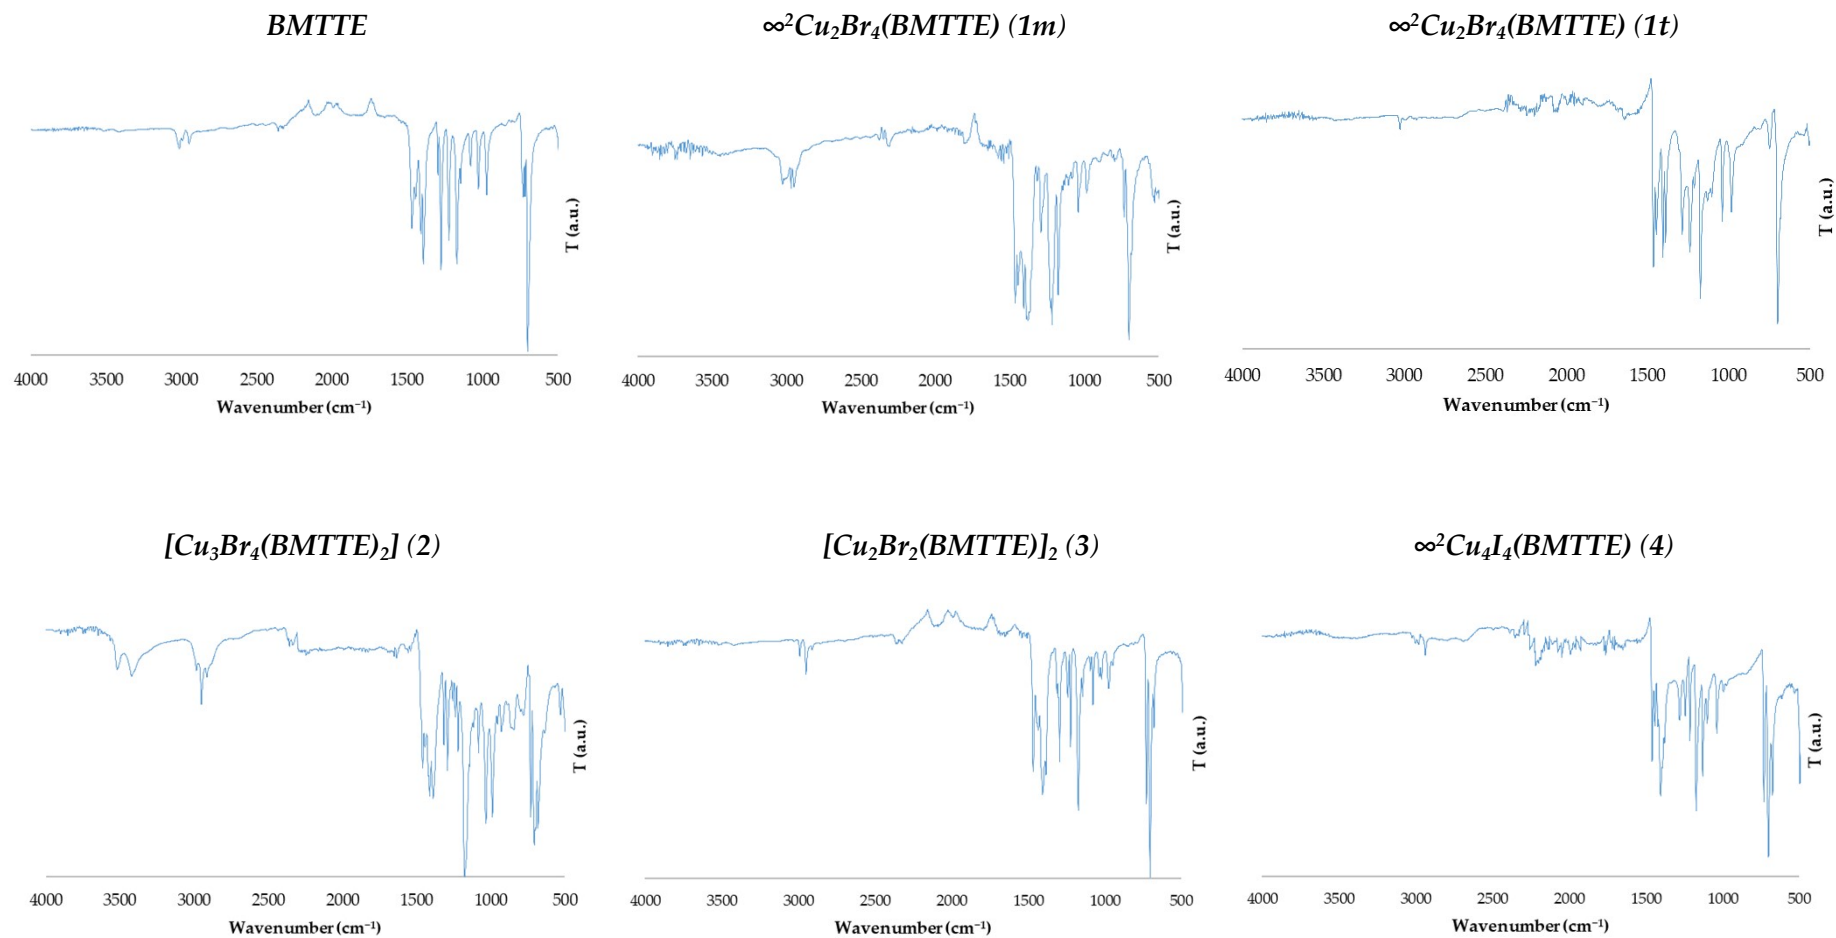

**Figure S1:** Infrared spectra (IR) of the BMTTE ligand and the complexes 1-4.

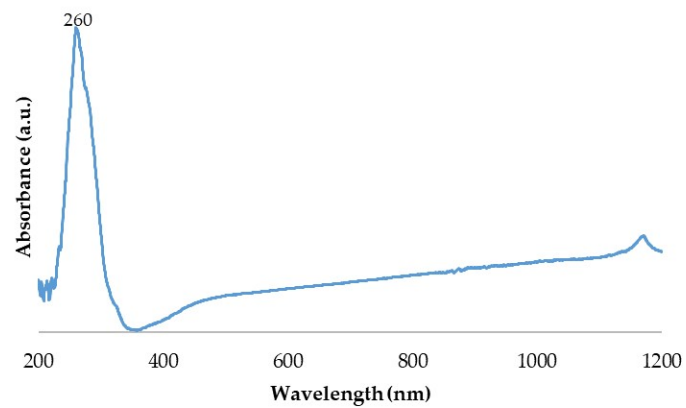

*BMTTE*

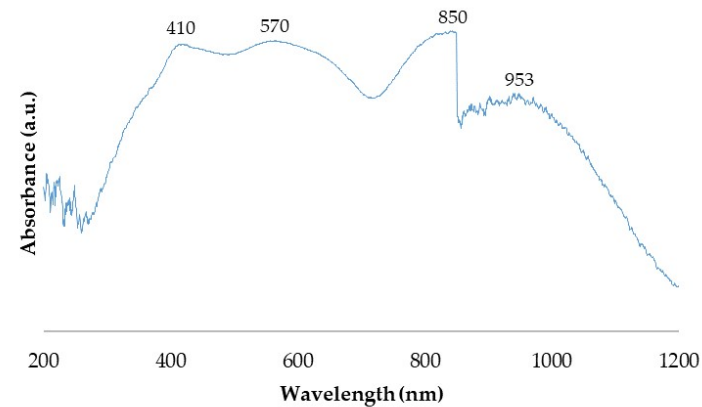

$\infty^2\text{Cu}_2\text{Br}_4(\text{BMTTE})$  (1 mix)

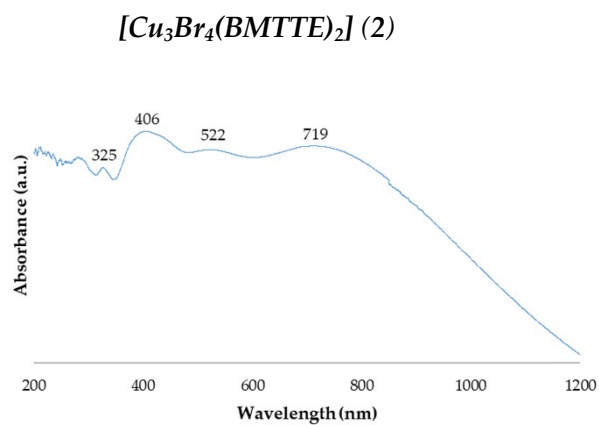

$[\text{Cu}_3\text{Br}_4(\text{BMTTE})_2]$  (2)

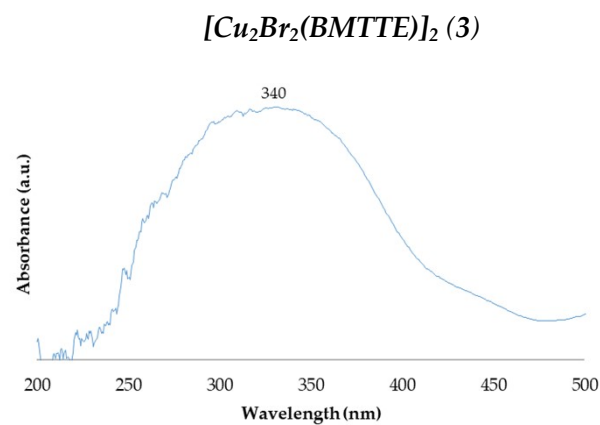

$[\text{Cu}_2\text{Br}_2(\text{BMTTE})]_2$  (3)

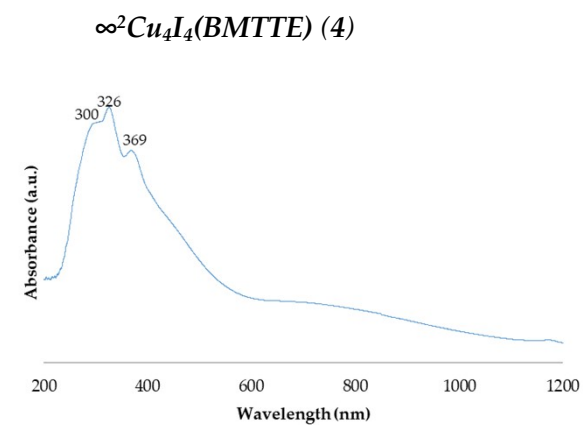

$\infty^2\text{Cu}_4\text{I}_4(\text{BMTTE})$  (4)

Figure S2: UV-Vis spectra of the BMTTE ligand and the complexes 1-4.

*Method A (1)*

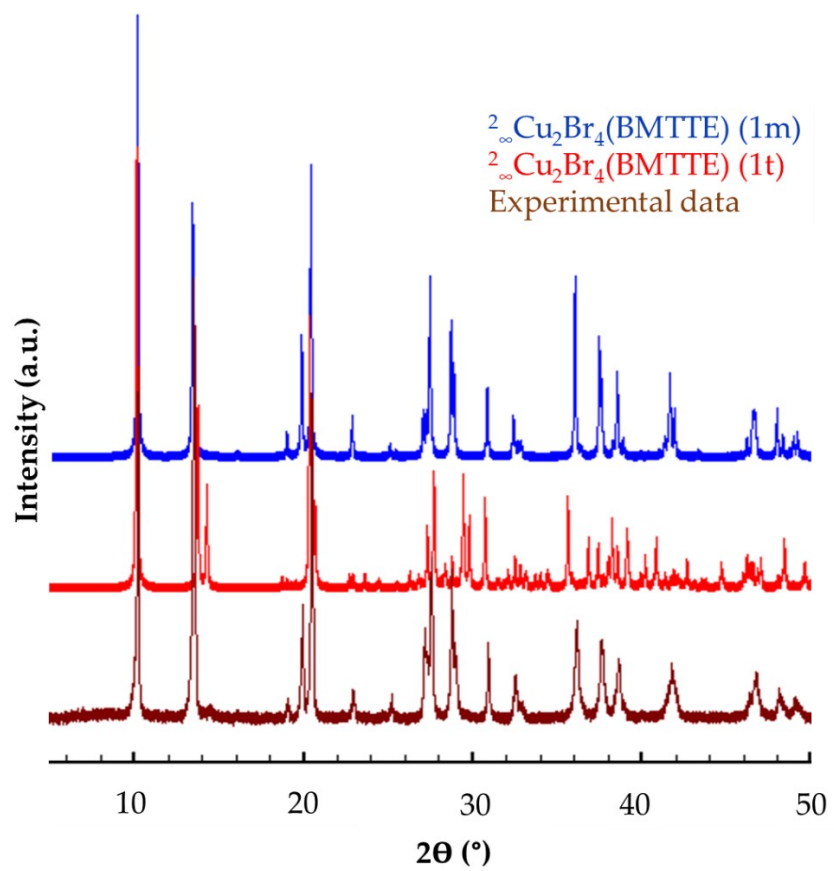

*Method B (1)*

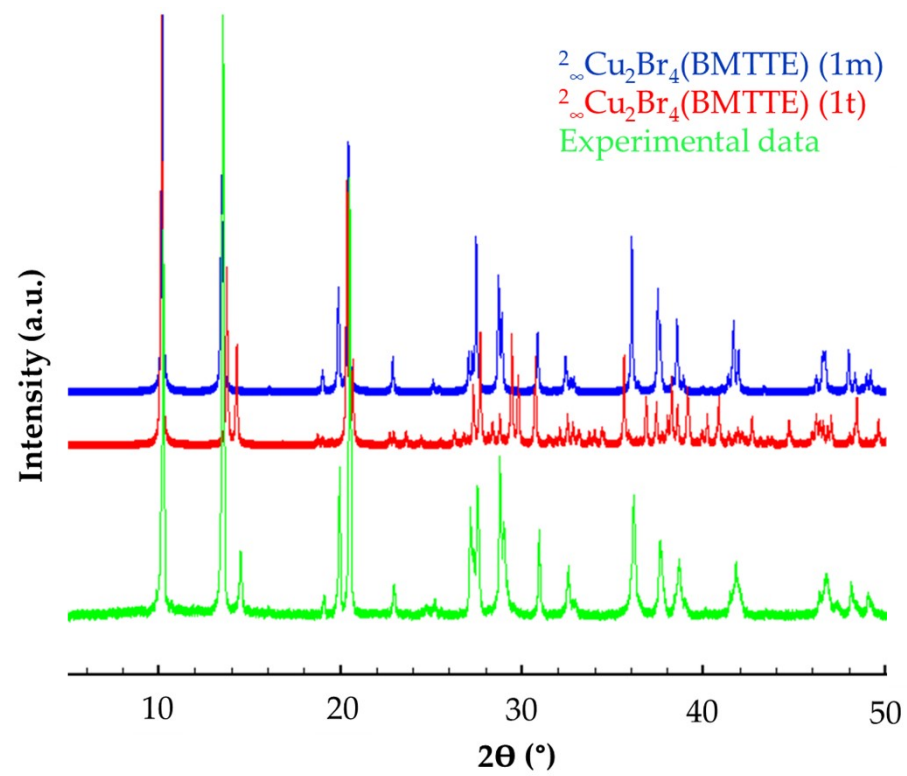

**Figure S3:** Powder X-ray diffraction (PXRD) comparison between bulk experimental data and simulation based on single crystal X-ray diffraction of **1**

Method A (2)

.....

Method B (2)

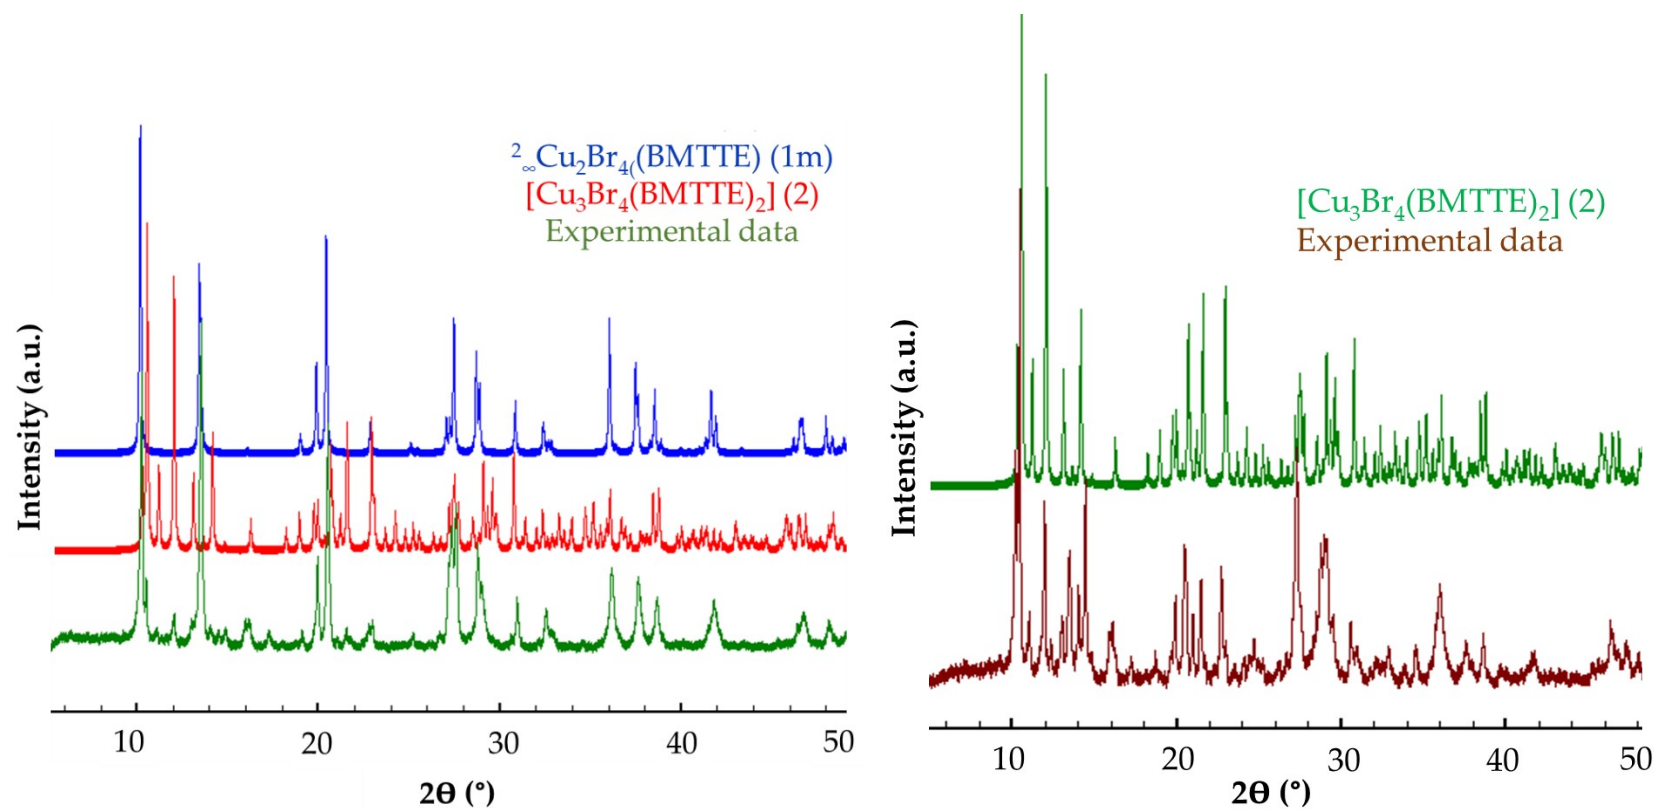

Figure S4: Powder X-ray diffraction (PXRD) comparison between bulk experimental data and simulation based on single crystal X-ray diffraction of 2.

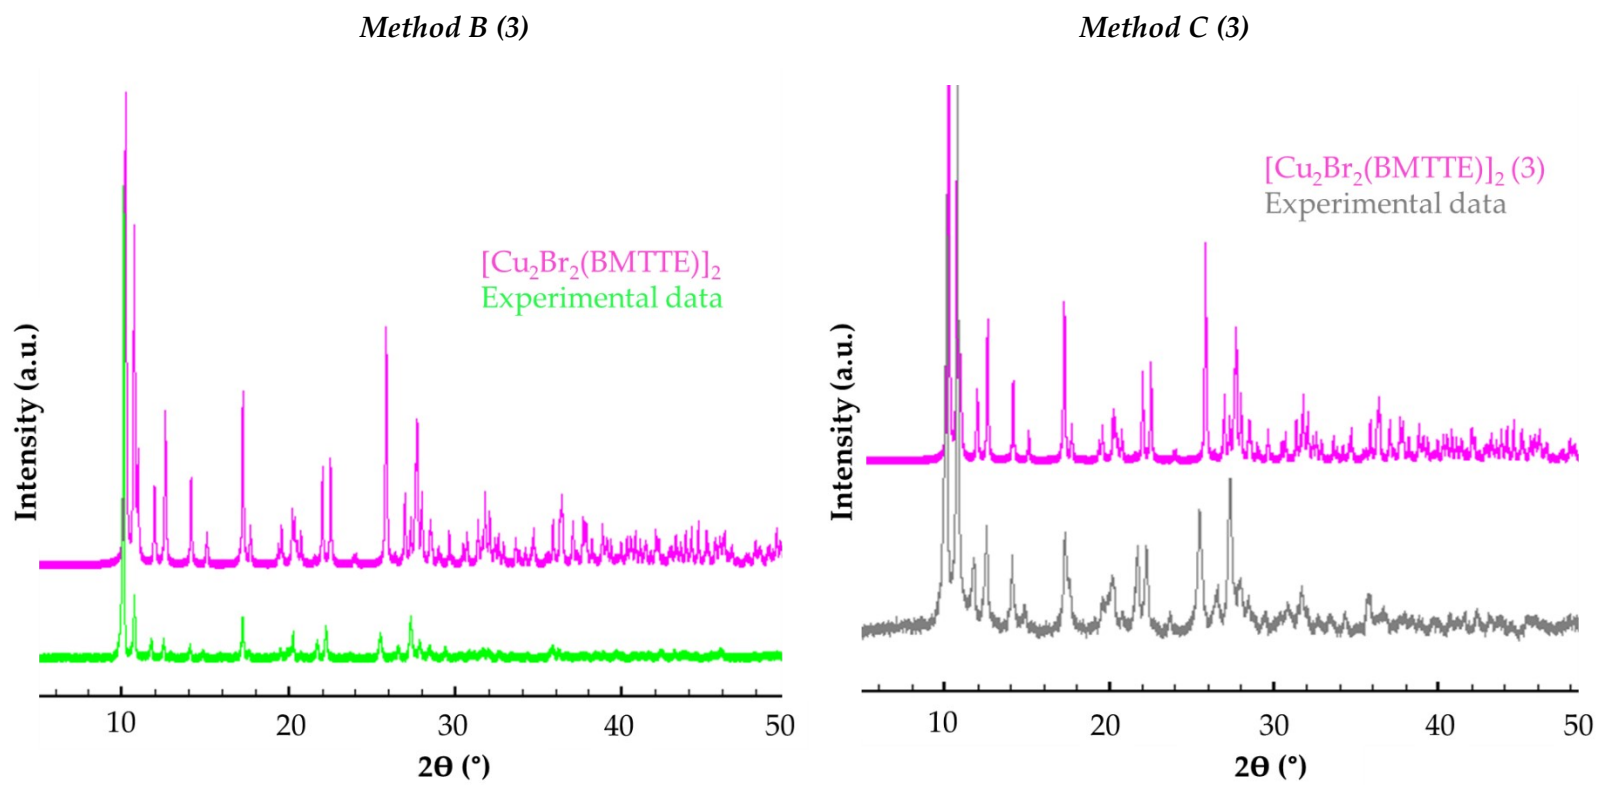

**Figure S5:** Powder X-ray diffraction (PXRD) comparison between bulk experimental data and simulation based on single crystal X-ray diffraction of **3**.

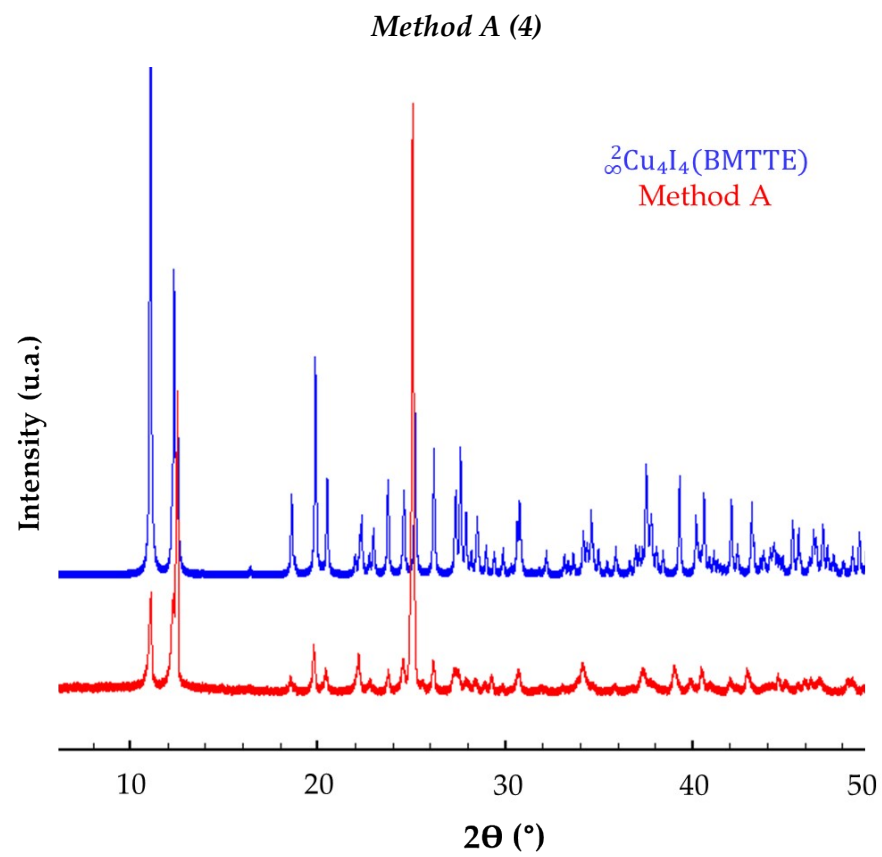

**Figure S6:** Powder X-ray diffraction (PXRD) comparison between bulk experimental data and simulation based on single crystal X-ray diffraction of **4**.



## 2. Crystallography

**Table S1:** Crystal data and structure refinement

| Compound                                    |     | 1m                                                               | 1t                                                                                           | 2                                                                                              | 3                                                                                              | 4                                                                                          |
|---------------------------------------------|-----|------------------------------------------------------------------|----------------------------------------------------------------------------------------------|------------------------------------------------------------------------------------------------|------------------------------------------------------------------------------------------------|--------------------------------------------------------------------------------------------|
| Empirical formula                           |     | C <sub>3</sub> H <sub>5</sub> Br <sub>2</sub> CuN <sub>4</sub> S | C <sub>6</sub> H <sub>10</sub> Br <sub>4</sub> Cu <sub>2</sub> N <sub>8</sub> S <sub>2</sub> | C <sub>12</sub> H <sub>20</sub> Br <sub>4</sub> Cu <sub>3</sub> N <sub>16</sub> S <sub>4</sub> | C <sub>12</sub> H <sub>20</sub> Br <sub>4</sub> Cu <sub>4</sub> N <sub>16</sub> S <sub>4</sub> | C <sub>3</sub> H <sub>5</sub> Cu <sub>2</sub> I <sub>2</sub> N <sub>4</sub> S <sub>2</sub> |
| Formula weight                              |     | 352.53                                                           | 705.06                                                                                       | 1026.94                                                                                        | 1090.48                                                                                        | 510.05                                                                                     |
| Crystal system, space group                 |     | Monoclinic, C2/m                                                 | Triclinic, P-1                                                                               | Monoclinic, P2 <sub>1</sub> /n                                                                 | Monoclinic, P2 <sub>1</sub> /n                                                                 | Triclinic, P-1                                                                             |
| CCDC reference                              |     | 2264490                                                          | 2264491                                                                                      | 2264492                                                                                        | 2264493                                                                                        | 2264494                                                                                    |
| Unit cell dimensions                        | a/Å | 14.182(2)                                                        | 6.9967(5)                                                                                    | 9.0902(7)                                                                                      | 10.2919(10)                                                                                    | 7.9700(4)                                                                                  |
|                                             | b/Å | 6.9954(10)                                                       | 9.1986(8)                                                                                    | 10.2268(7)                                                                                     | 9.6293(9)                                                                                      | 8.3490(5)                                                                                  |
|                                             | c/Å | 9.3508(14)                                                       | 13.6109(11)                                                                                  | 15.9673(11)                                                                                    | 14.8207(13)                                                                                    | 8.9632(5)                                                                                  |
|                                             | α/° | -                                                                | 71.516(3)                                                                                    | -                                                                                              | -                                                                                              | 111.095(2)                                                                                 |
|                                             | β/° | 111.712(4)                                                       | 86.140(2)                                                                                    | 98.710(2)                                                                                      | 92.996(3)                                                                                      | 98.825(2)                                                                                  |
|                                             | γ/° | -                                                                | 87.700(2)                                                                                    | -                                                                                              | -                                                                                              | 107.631(2)                                                                                 |
| Volume/Å <sup>3</sup>                       |     | 861.9(2)                                                         | 828.76(12)                                                                                   | 1467.26(18)                                                                                    | 1466.8(2)                                                                                      | 506.69(5)                                                                                  |
| Z, ρ <sub>calc</sub> /g·cm <sup>-3</sup>    |     | 4/2.717                                                          | 2/2.825                                                                                      | 2/2.324                                                                                        | 2/2.469                                                                                        | 2/3.343                                                                                    |
| F(000)                                      |     | 664                                                              | 664                                                                                          | 990                                                                                            | 1048                                                                                           | 462                                                                                        |
| Crystal size (mm <sup>3</sup> )             |     | 0.069x0.063x0.019                                                | 0.123x0.074x0.015                                                                            | 0.153x0.125x0.098                                                                              | 0.255x0.144x0.093                                                                              | 0.098x0.056x0.035                                                                          |
| Abs. coeff. (mm <sup>-1</sup> )             |     | 16.246                                                           | 12.466                                                                                       | 7.924                                                                                          | 8.633                                                                                          | 10.447                                                                                     |
| θ Range (°)                                 |     | 5.091-71.873                                                     | 2.371-28.343                                                                                 | 2.373-28.352                                                                                   | 2.752-28.378                                                                                   | 2.549 – 28.379                                                                             |
| Max./min. transmission                      |     | 0.7535/0.4461                                                    | 0.7461/0.6127                                                                                | 0.7457/0.5666                                                                                  | 0.7457/0.2994                                                                                  | 0.7457 / 0.5671                                                                            |
| Reflections collected                       |     | 8529                                                             | 28424                                                                                        | 19153                                                                                          | 22985                                                                                          | 20806                                                                                      |
| Independent reflections (R <sub>int</sub> ) |     | 923 (0.0504)                                                     | 4130 (0.0407)                                                                                | 3662 (0.0425)                                                                                  | 3634 (0.1336)                                                                                  | 2534 (0.0245)                                                                              |
| Final R indices [I>2σ(I)]                   |     | R1 =0.0229; wR2=0.0633                                           | R1 = 0.0219;;wR2 = 0.0500                                                                    | R1 = 0.0275wR2 = 0.0549                                                                        | R1 = 0.0453wR2 = 0.1047                                                                        | R1 = 0.0178, wR2 = 0.037                                                                   |

Table S2: Selected bond lengths/Å and angles/° for **1m** and **1t**

|                      | <b>1m</b>  | <b>1t</b>  |                                                                                                             | <b>1m</b>  | <b>1t</b>   |                      | <b>1t</b>   |
|----------------------|------------|------------|-------------------------------------------------------------------------------------------------------------|------------|-------------|----------------------|-------------|
| <b>Br1-Cu1</b>       | 2.4381(5)  | 2.4434(4)  | <b>Cu2-Br3-Cu1</b>                                                                                          |            | 94.075(12)  | <b>N3-Cu1-Br2</b>    | 99.22(5)    |
| <b>Br1-Cu1#1</b>     | 2.4420(5)  |            | <b>Cu2-Br4-Cu1#1</b>                                                                                        |            | 94.313(13)  | <b>N3-Cu1-Br3</b>    | 96.83(5)    |
| <b>Br2-Cu1</b>       |            | 2.4396(3)  | <b>Br1-Cu1-Br1#2</b>                                                                                        | 164.44(2)  |             | <b>N3-Cu1-Br4#2</b>  | 100.09(5)   |
| <b>Br3-Cu1</b>       |            | 2.4366(4)  | <b>Br1-Cu1-Br1#1</b>                                                                                        | 86.330(15) |             | <b>Br2-Cu2-Br1#1</b> | 162.965(14) |
| <b>Br4-Cu1#1</b>     |            | 2.4389(3)  | <b>Br1#2-Cu1-Br1#1</b>                                                                                      | 91.55(2)   |             | <b>Br3-Cu2-Br1#1</b> | 90.780(13)  |
| <b>Br1-Cu2#2</b>     |            | 2.4500(4)  | <b>Br2-Cu1-Br1</b>                                                                                          |            | 164.460(14) | <b>Br4-Cu2-Br1#1</b> | 85.939(12)  |
| <b>Br2-Cu2</b>       |            | 2.4469(4)  | <b>Br3-Cu1-Br1</b>                                                                                          |            | 92.456(13)  | <b>Br3-Cu2-Br2</b>   | 86.197(12)  |
| <b>Br3-Cu2</b>       |            | 2.4283(3)  | <b>Br4#2-Cu1-Br1</b>                                                                                        |            | 85.961(12)  | <b>Br4-Cu2-Br2</b>   | 92.419(13)  |
| <b>Br4-Cu2</b>       |            | 2.4332(3)  | <b>Br3-Cu1-Br2</b>                                                                                          |            | 86.177(12)  | <b>Br3-Cu2-Br4</b>   | 164.175(14) |
| <b>Cu1-N3</b>        | 2.223(3)   | 2.2441(18) | <b>Br4#2-Cu1-Br2</b>                                                                                        |            | 90.853(12)  | <b>N7-Cu2-Br4</b>    | 96.64(5)    |
| <b>Cu2-N7</b>        |            | 2.2307(19) | <b>Br3-Cu1-Br4#2</b>                                                                                        |            | 163.077(14) | <b>N7-Cu2-Br3</b>    | 99.18(5)    |
| <b>Cu1-Br1-Cu1#1</b> | 93.671(15) |            | <b>N3-Cu1-Br1#1</b>                                                                                         | 96.27(6)   |             | <b>N7-Cu2-Br2</b>    | 96.21(5)    |
| <b>Cu1-Br1-Cu2#2</b> |            | 93.776(13) | <b>N3-Cu1-Br1</b>                                                                                           | 99.29(6)   | 96.31(5)    | <b>N7-Cu2-Br1#1</b>  | 100.83(5)   |
| <b>Cu1-Br2-Cu2</b>   |            | 93.534(12) | Symmetry code: ( <b>1m</b> ) #1 -x+3/2,-y+3/2,-z; #2 -x+3/2,y-1/2,-z; ( <b>1t</b> ) #1 x-1,y,z; #2 x+1,y,z; |            |             |                      |             |

**Table S3:** Selected bond lengths/Å and angles/° for **2** and **3**

|                        | <b>2</b>    | <b>3</b>    |                                                            | <b>2</b>    | <b>3</b>    |                        | <b>2</b> | <b>3</b>   |
|------------------------|-------------|-------------|------------------------------------------------------------|-------------|-------------|------------------------|----------|------------|
| <b>Cu1-Br1</b>         | 2.6349(4)   | 2.5400(5)   | <b>N4-Cu1-Br1</b>                                          | 87.02(6)    | 99.75(7)    | <b>N3-Cu2-N3#1</b>     | 180.0    |            |
| <b>Cu1-Br2</b>         | 2.4077(5)   |             | <b>N4-Cu1-Br2</b>                                          | 98.39(7)    |             | <b>N3-Cu2-Br1#1</b>    | 93.33(7) | 96.34(8)   |
| <b>Br2-Cu1#1</b>       |             | 2.5845(5)   | <b>N4-Cu1-Br2#1</b>                                        |             | 113.54(7)   | <b>N3#1-Cu2-Br1#1</b>  | 86.66(7) |            |
| <b>Cu1-N4</b>          | 2.081(3)    | 2.035(3)    | <b>N4-Cu1-Cu2#1</b>                                        |             | 99.47(7)    | <b>N3-Cu2-Br2</b>      | 86.14(7) | 130.85(9)  |
| <b>Cu1-N8</b>          | 1.955(2)    | 2.026(3)    | <b>N8-Cu1-N4</b>                                           | 130.34(10)  |             | <b>N3#1-Cu2-Br2</b>    | 93.86(7) |            |
| <b>Cu2-Br1</b>         | 2.4247(3)   | 2.5264(6)   | <b>N8-Cu1-Br1</b>                                          | 108.68(7)   | 104.27(8)   | <b>N3-Cu2-Cu2#1</b>    |          | 102.57(9)  |
| <b>Br1-Cu2#1</b>       |             | 2.5952(5)   | <b>N8-Cu1-Br2</b>                                          | 122.56(7)   |             | <b>N3-Cu2-Cu1#1</b>    |          | 147.14(8)  |
| <b>Br2-Cu2</b>         | 3.0865(3)   | 2.3881(5)   | <b>N8-Cu1-Br2#1</b>                                        |             | 95.60(8)    | <b>Br1#1-Cu2-Cu2#1</b> |          | 57.729(17) |
| <b>Cu2-Cu1#1</b>       |             | 2.8551(6)   | <b>N8-Cu1-Cu2#1</b>                                        |             | 124.57(9)   | <b>Br1-Cu2-Cu2#1</b>   |          | 60.291(18) |
| <b>Cu2-Cu2#1</b>       |             | 2.6376(9)   | <b>N8-Cu1-N4</b>                                           |             | 135.96(11)  | <b>Br1#1-Cu2-Cu1#1</b> |          | 55.307(13) |
| <b>Cu2-N3</b>          | 2.037(2)    | 2.035(3)    | <b>Br1#1-Cu2-Br1</b>                                       | 179.999(12) | 118.020(19) | <b>Br1-Cu2-Cu1#1</b>   |          | 110.95(2)  |
| <b>Br2-Cu1-Br1</b>     | 101.147(16) |             | <b>Br1-Cu2-Br2</b>                                         | 89.184(9)   | 107.245(19) | <b>Br2-Cu2-Cu2#1</b>   |          | 126.58(3)  |
| <b>Br1-Cu1-Br2#1</b>   |             | 104.275(18) | <b>Br1#1-Cu2-Br2</b>                                       | 90.816(9)   | 108.489(18) | <b>Br2-Cu2-Cu1#1</b>   |          | 58.254(13) |
| <b>Br1-Cu1-Cu2#1</b>   |             | 57.147(13)  | <b>N3-Cu2-Br1</b>                                          | 86.67(7)    | 96.53(8)    | <b>Cu2#1-Cu2-Cu1#1</b> |          | 77.43(2)   |
| <b>Br2#1-Cu1-Cu2#1</b> |             | 51.792(13)  | Symmetry code: (2) #1 -x+1,-y+2,-z+1; (3) #1 -x+1,-y,-z+1; |             |             |                        |          |            |

**Table S4:** Selected bond lengths/Å and angles/° for 4

|                      |             |                       |             |                        |             |
|----------------------|-------------|-----------------------|-------------|------------------------|-------------|
| <b>I2-Cu1#1</b>      | 2.6254(4)   | <b>I2#1-Cu1-I1</b>    | 106.416(13) | <b>I1-Cu2-I1#1</b>     | 121.561(13) |
| <b>I2-Cu1#2</b>      | 2.6515(4)   | <b>I2-Cu1-Cu2#1</b>   | 153.529(16) | <b>I1#1-Cu2-Cu1#1</b>  | 59.131(11)  |
| <b>I2-Cu2</b>        | 2.6081(4)   | <b>I2#1-Cu1-Cu2#1</b> | 58.241(11)  | <b>I1-Cu2-Cu1#1</b>    | 109.944(14) |
| <b>I1-Cu1</b>        | 2.6816(4)   | <b>I1-Cu1-Cu2#1</b>   | 59.941(11)  | <b>Cu2#1-Cu2-I1</b>    | 61.205(13)  |
| <b>I1-Cu2</b>        | 2.6816(4)   | <b>N3-Cu1-I2#3</b>    | 103.24(6)   | <b>Cu2#1-Cu2-I1#1</b>  | 60.356(14)  |
| <b>I1-Cu2#1</b>      | 2.7039(4)   | <b>N3-Cu1-I2#1</b>    | 123.99(7)   | <b>Cu2#1-Cu2-Cu1#1</b> | 79.644(17)  |
| <b>Cu2-Cu2#1</b>     | 2.6291(7)   | <b>N3-Cu1-I1</b>      | 96.27(6)    | <b>N4-Cu2-I2</b>       | 122.66(6)   |
| <b>Cu1-Cu2#1</b>     | 2.7305(5)   | <b>N3-Cu1-Cu2#1</b>   | 100.90(6)   | <b>N4-Cu2-I1#1</b>     | 98.28(7)    |
| <b>Cu1-N3</b>        | 2.089(2)    | <b>I2-Cu2-I1#1</b>    | 109.948(13) | <b>N4-Cu2-I1</b>       | 97.48(6)    |
| <b>Cu2-N4</b>        | 2.051(2)    | <b>I2-Cu2-I1</b>      | 107.410(13) | <b>N4-Cu2-Cu1#1</b>    | 150.82(7)   |
| <b>I2#1-Cu1-I2#3</b> | 114.358(13) | <b>I2-Cu2-Cu1#1</b>   | 58.863(11)  | <b>N4-Cu2-Cu2#1</b>    | 106.31(7)   |
| <b>I2#1-Cu1-I1</b>   | 110.112(13) | <b>I2-Cu2-Cu2#1</b>   | 131.00(2)   |                        |             |

Symmetry code: #1 -x+1,-y+2,-z+1; #2 x+1,y,z; #3 x-1,y,z;

Table S5: Main hydrogen bonds (Å,°)

|    | D-H...A                | d(D-H) | d(H...A) | d(D...A) | ∠(DHA) |
|----|------------------------|--------|----------|----------|--------|
| 1m | C(12)-H(12A)...Br(1)#1 | 0.96   | 3.11     | 3.655(3) | 117.2  |
|    | C(12)-H(12B)...Br(1)#2 | 0.96   | 3.12     | 3.994(4) | 152.4  |
| 1t | C(22)-H(22A)...Br(3)#2 | 0.98   | 2.98     | 3.737(2) | 134.5  |
|    | C(22)-H(22A)...N(4)#2  | 0.98   | 2.68     | 3.455(3) | 136.7  |
|    | C(22)-H(22C)...N(6)#3  | 0.98   | 2.62     | 3.597(3) | 176.0  |
|    | C(12)-H(12A)...N(2)#4  | 0.98   | 2.68     | 3.656(3) | 171.4  |
|    | C(12)-H(12C)...Br(2)#5 | 0.98   | 3.05     | 3.868(2) | 141.3  |
|    | C(2)-H(2B)...C(12)#1   | 0.99   | 2.82     | 3.653(3) | 142.7  |
| 2  | C(12)-H(12B)...N(7)#1  | 0.98   | 2.69     | 3.528(4) | 143.4  |
|    | C(22)-H(22C)...Br(2)#2 | 0.98   | 2.90     | 3.506(3) | 121.1  |
|    | C(22)-H(22B)...Br(2)#3 | 0.98   | 2.82     | 3.578(3) | 135.0  |
|    | C(2)-H(2B)...Br(2)#2   | 0.99   | 3.12     | 3.844(3) | 130.8  |
|    | C(2)-H(2B)...Br(1)#4   | 0.99   | 2.84     | 3.704(3) | 146.2  |
|    | C(1)-H(1B)...Br(1)#2   | 0.99   | 3.11     | 3.663(3) | 116.6  |
| 3  | C(22)-H(22A)...S(1)#2  | 0.98   | 2.98     | 3.686(2) | 130.3  |
|    | C(22)-H(22C)...Br(2)#3 | 0.98   | 3.01     | 3.525(2) | 113.7  |
|    | C(12)-H(12A)...N(2)#4  | 0.98   | 2.69     | 3.608(3) | 156.8  |
|    | C(1)-H(1B)...N(7)#5    | 0.99   | 2.66     | 3.465(3) | 138.2  |
|    | C(2)-H(2A)...Br(1)#6   | 0.99   | 2.91     | 3.807(2) | 151.4  |
|    | C(2)-H(2A)...Br(2)#6   | 0.99   | 3.02     | 3.654(2) | 123.0  |
|    | C(2)-H(2B)...Br(2)#1   | 0.99   | 2.98     | 3.904(2) | 156.0  |
| 4  | C(1)-H(1A)...I(2)      | 0.99   | 3.19     | 3.962(3) | 135.6  |
|    | C(1)-H(1B)...N(2)#1    | 0.99   | 2.62     | 3.460(3) | 142.9  |
|    | C(12)-H(12B)...I(2)#2  | 0.98   | 3.26     | 3.999(3) | 133.9  |
|    | C(12)-H(12C)...I(13)#2 | 0.98   | 3.11     | 3.963(3) | 146.4  |

Symmetry code: (1m) #1 -x+2,-y+1,-z+1; #2 x,-y+1,z+1; (1t) #1 x-1,y-1,z; #2 x,y-1,z; #3 -x+1,-y,-z+1; #4 -x+2,-y+2,-z; #5 x,y+1,z; (2)#1 x-1,y,z; #2 x,y-1,z; #3 -x+3/2,y-1/2,-z+1/2; #4 -x+1/2,y-1/2,-z+1/2; (3) #1 -x+1,-y,-z+1; #2 -x+3/2,y+1/2,-z+3/2; #3 x-1/2,-y+1/2,z+1/2; #4 -x+2,-y,-z+1; #5 -x+1,-y+1,-z+1; #6 x+1/2,-y+1/2,z+1/2; (4) #1 x+1,y,z; #2 x-1,y-1,z-1;

Bmtte ligand

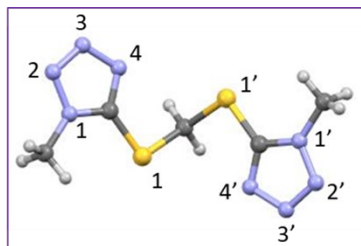

Coordination mode bmtte

Inorganic unit

Coordination geometry

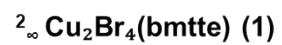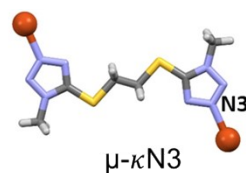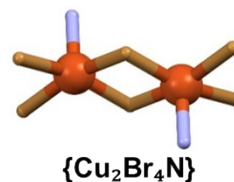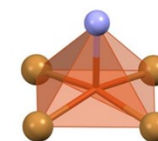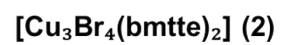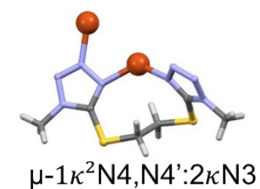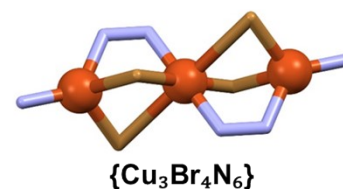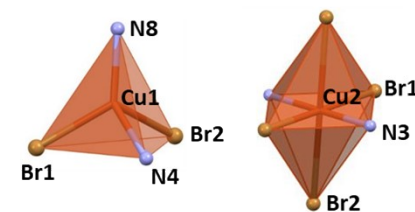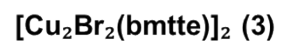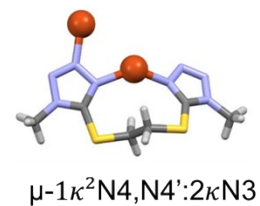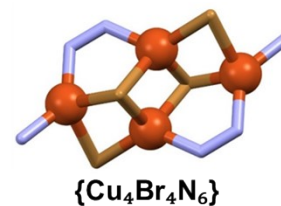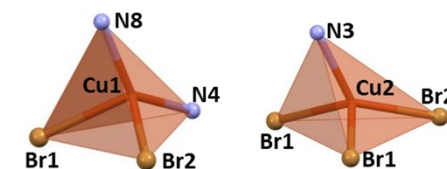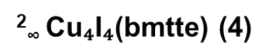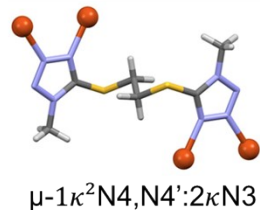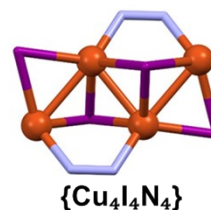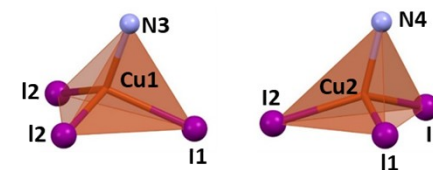

Figure S7: Top: free bmtte ligand. Down: Main structural features of compounds 1-4

### 3. Hirshfeld surface analysis

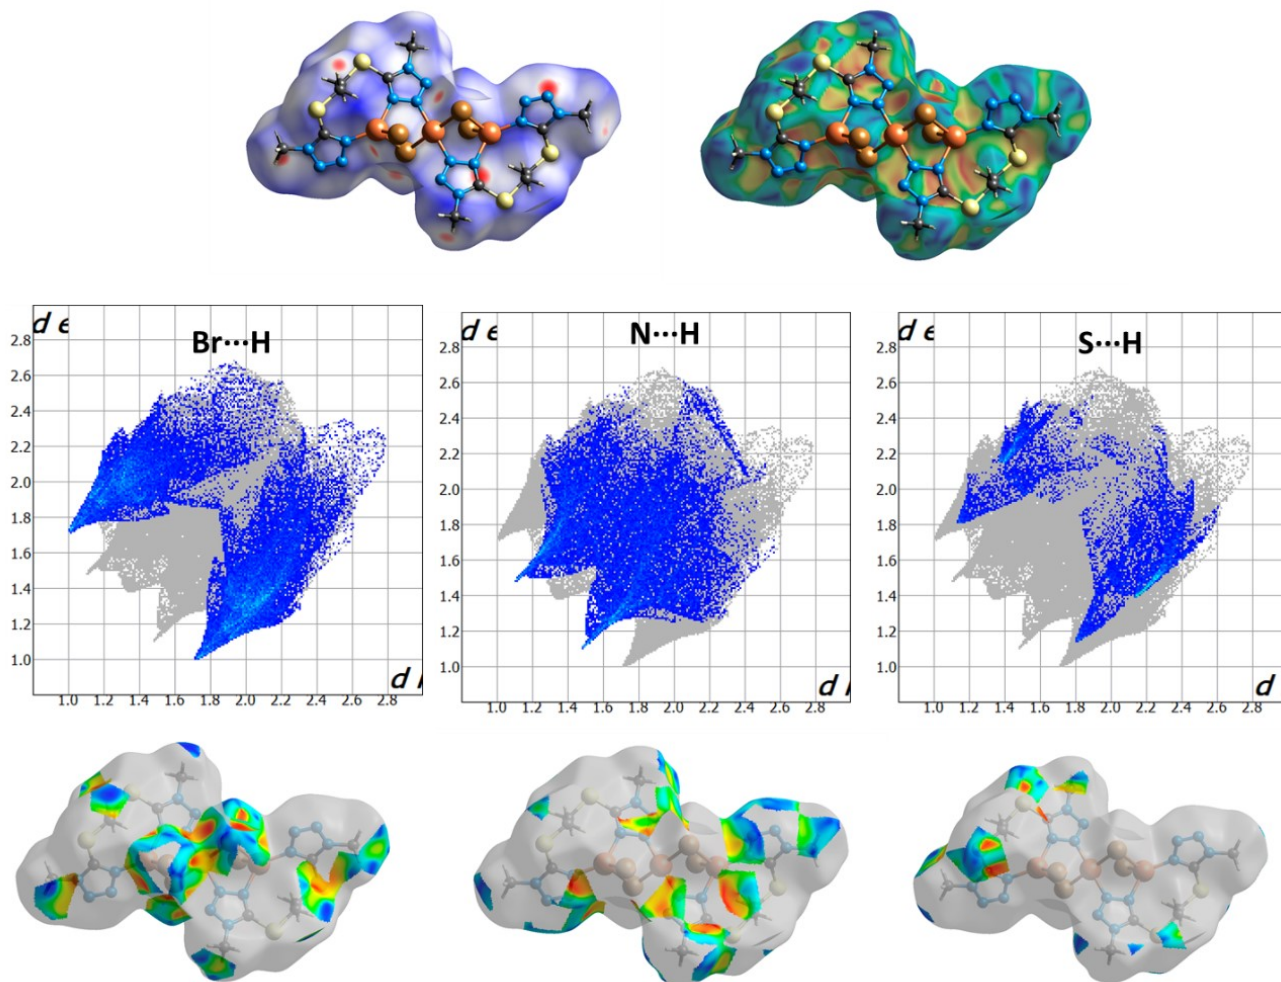

**Figure S8:** View of the three-dimensional Hirshfeld surface mapped over  $d_{\text{norm}}$  for (2) (top) and Hirshfeld surface mapped with the shape-index property illustrating contacts Br...H, N...H, and S...H in the crystal of (2) (down); Fingerprint plots into H...Br/ Br...H, H...N/ N...H, S...H/ H...S contacts

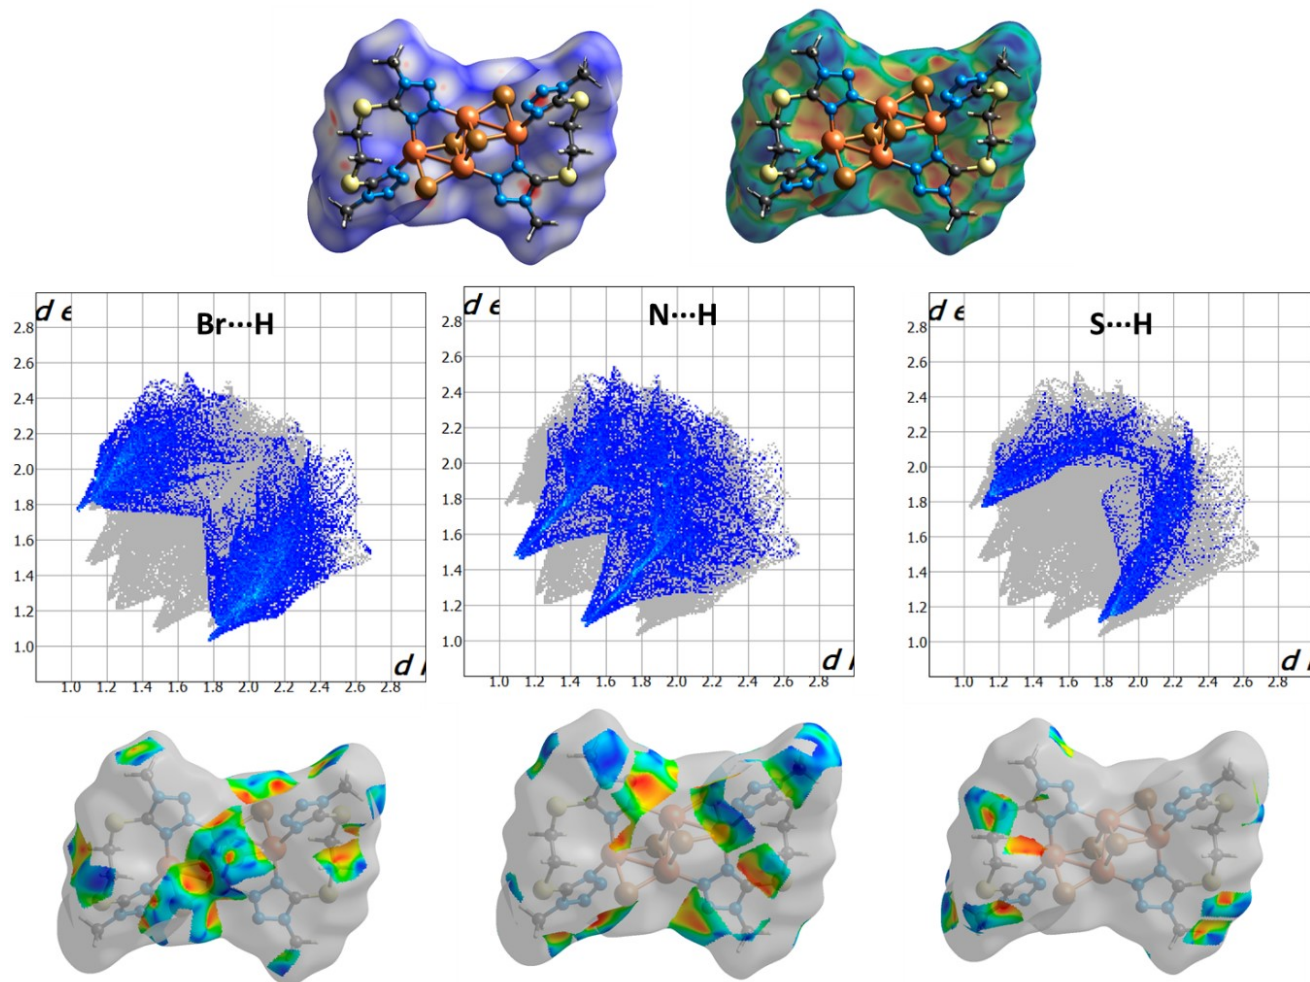

**Figure S9:** View of the three-dimensional Hirshfeld surface mapped over  $d_{\text{norm}}$  for (3) (top) and Hirshfeld surface mapped with the shape-index property illustrating contacts Br...H, N...H, and S...H in the crystal of (3) (down). Fingerprint plots into H...Br/ Br...H, H...N/ N...H, S...H/ H...S contacts.



#### 4. Thermal stability

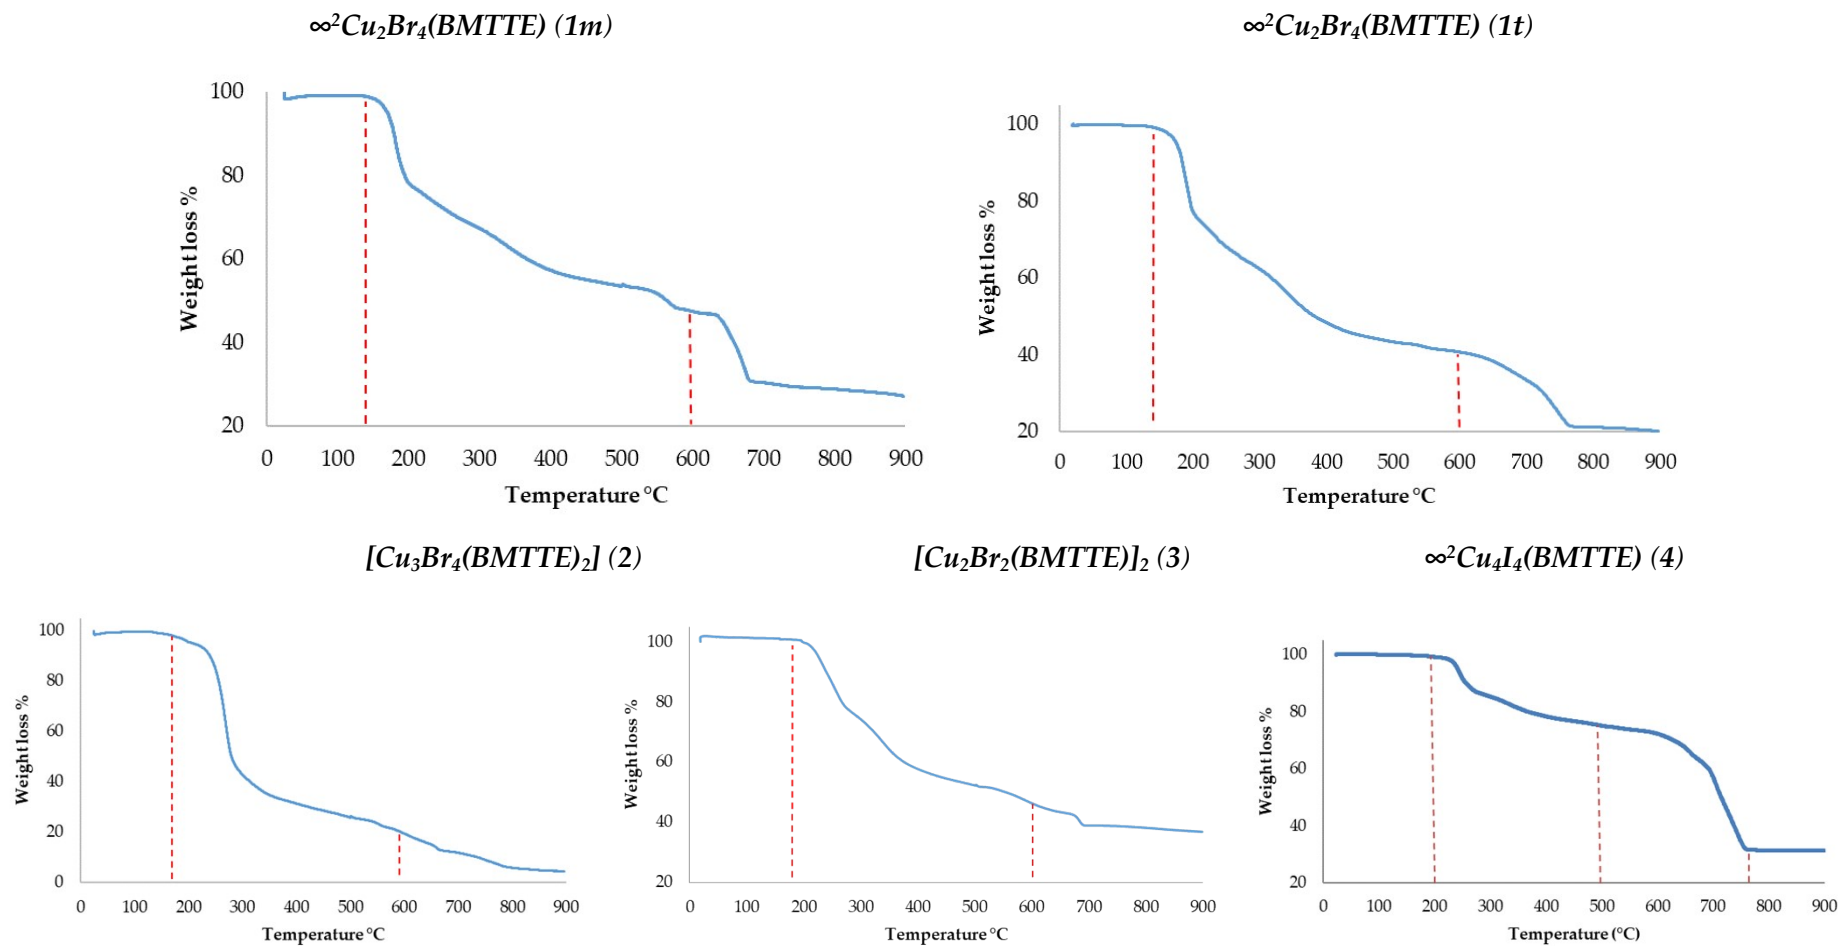

Figure S10: Thermogravimetric analysis (TGA)

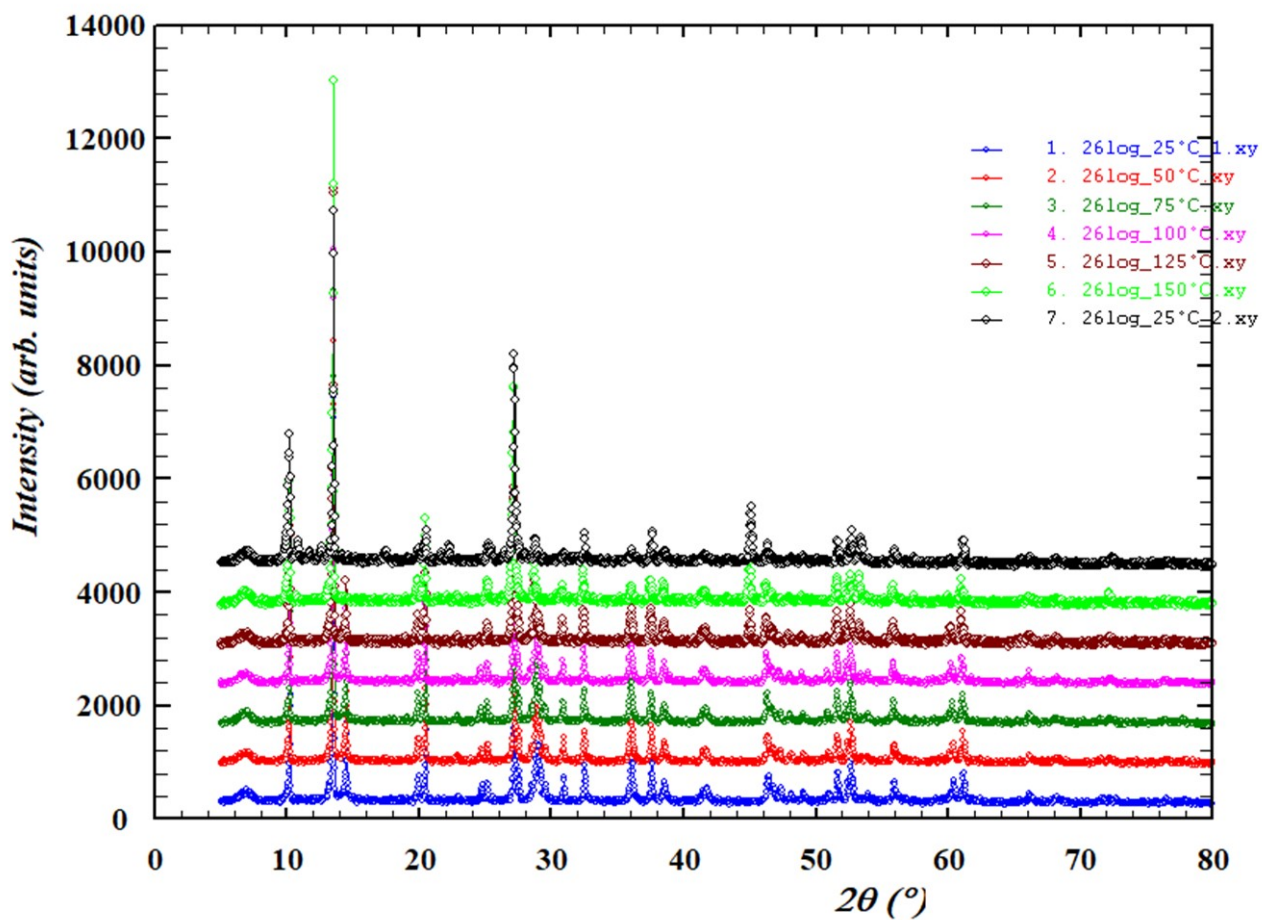

Figure S11: Variable-temperature X-ray powder diffraction of **1m** (blue) in the range 25–150°C with XRD pattern of the final product at room temperature after heating.

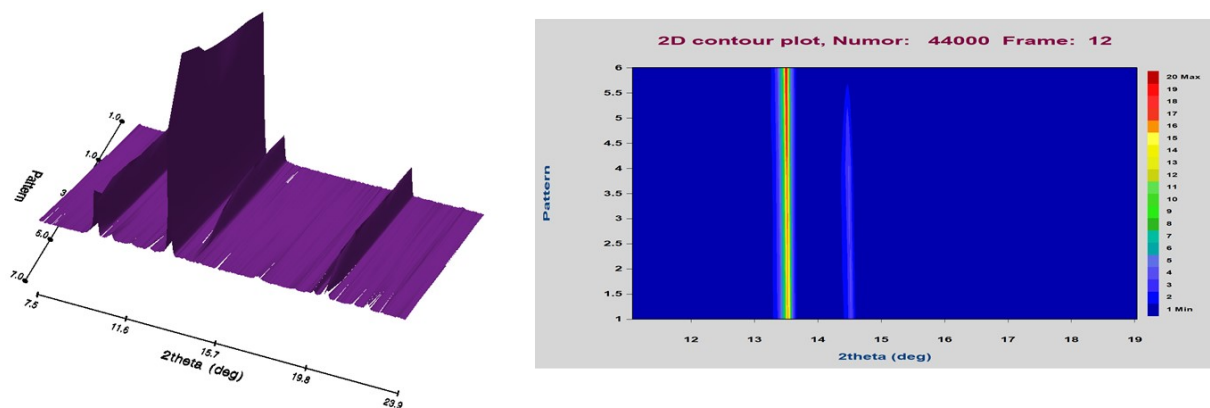

Figure S12: Three (left) and Two-dimensional (right) intensity contours of **1m** extracted from the XRTD patterns collected as a function of the temperature in the range 25–150°C.

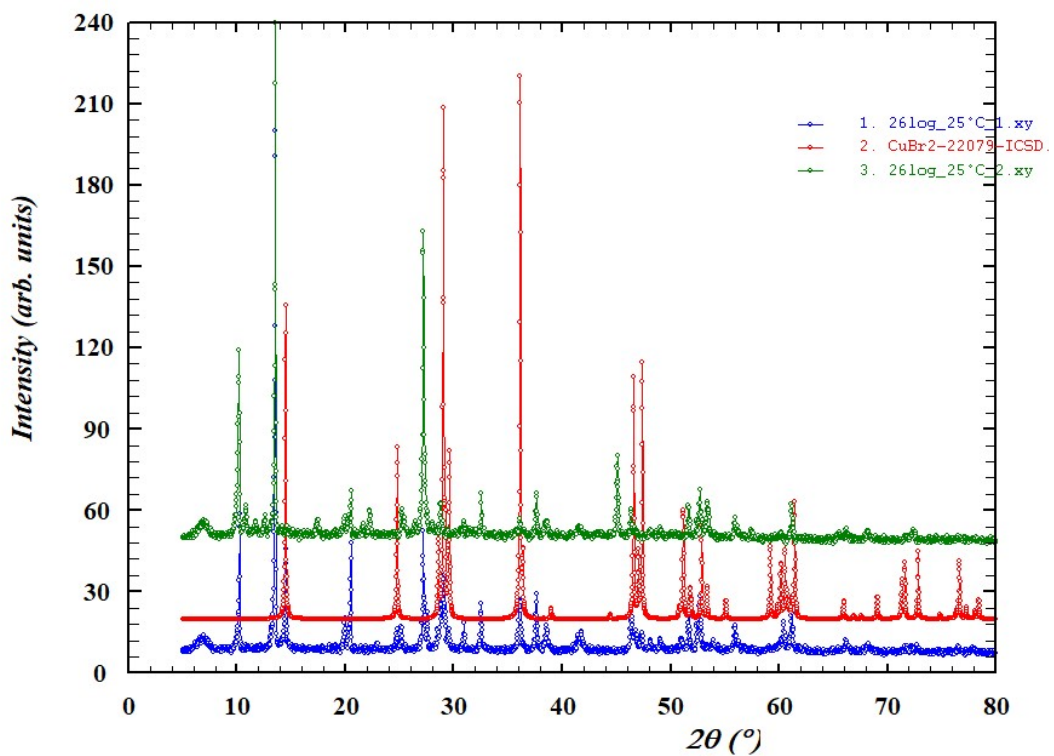

Figure S13: **1m** before (blue) and after (green) heat treatment with the XRD pattern of the CuBr<sub>2</sub> metal salt (red).

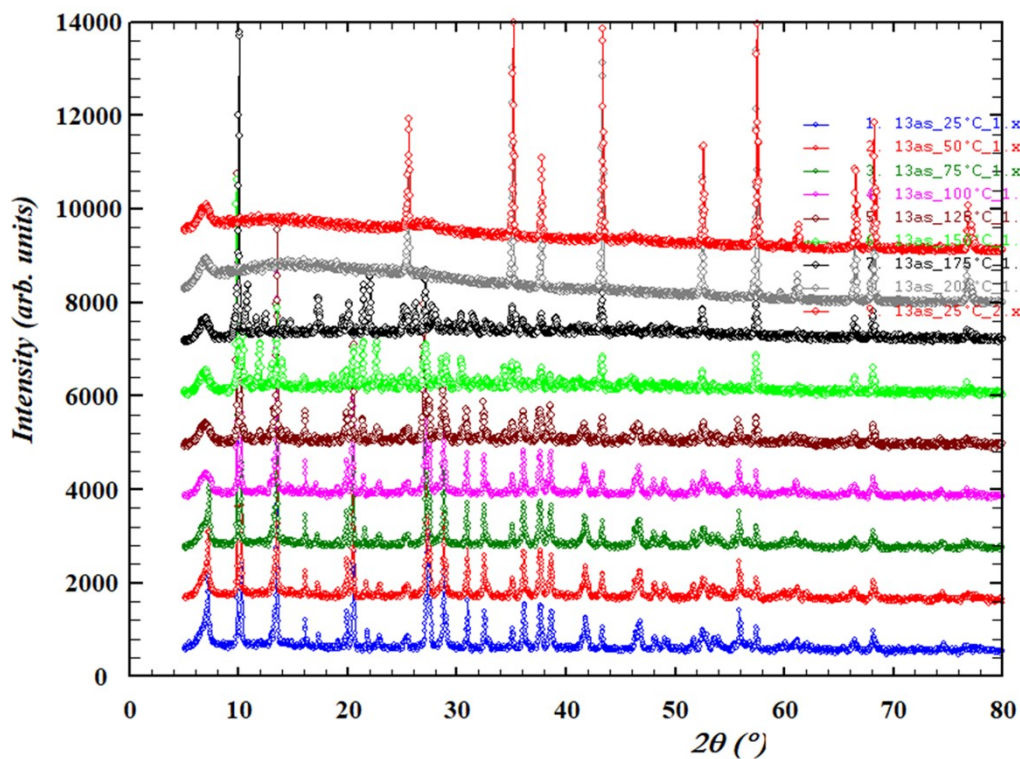

Figure S14 Variable-temperature X-ray powder diffraction of **1m** and **1t** in the range 25–200°C with the thermal decomposition after 175 °C. The remaining peaks are due to the alumina used as a holder.

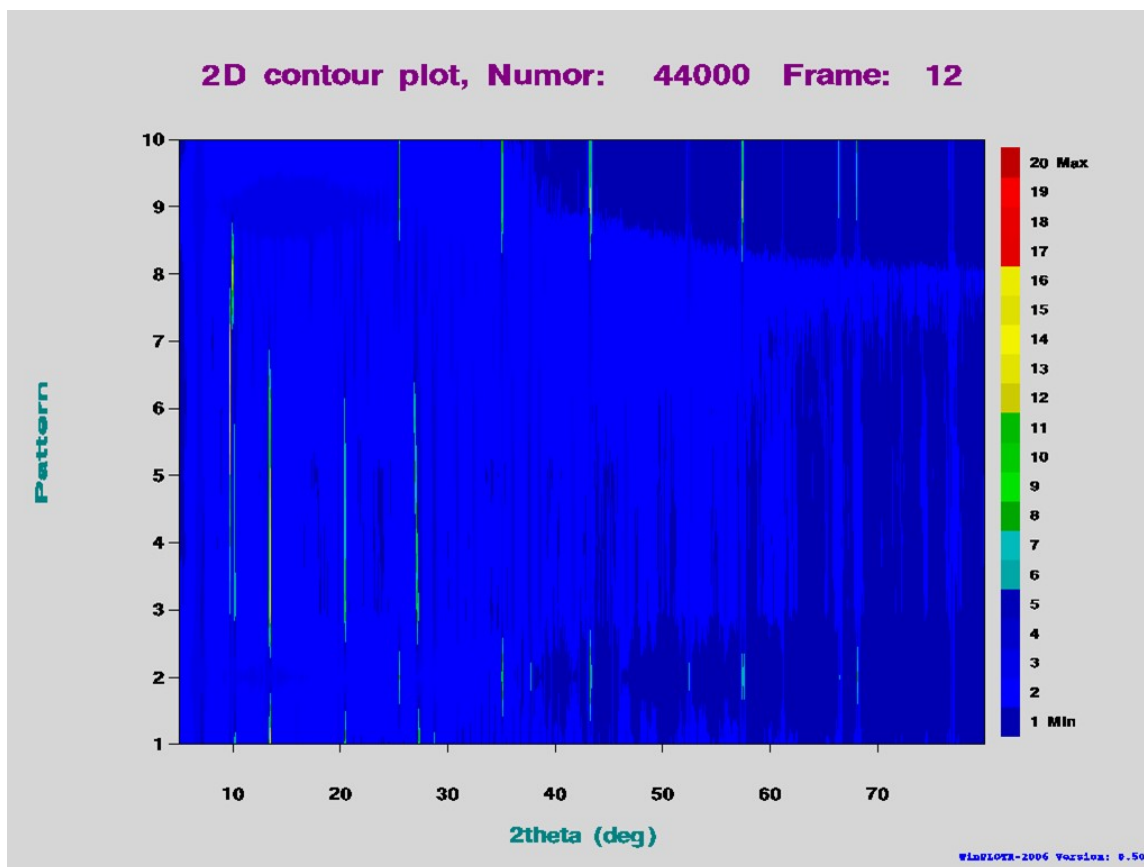

Figure S15: Two-dimensional intensity contours extracted from the XRTD patterns of **1m** and **1t** collected as a function of the temperature range 25–150°C.

## 5. Water Stability

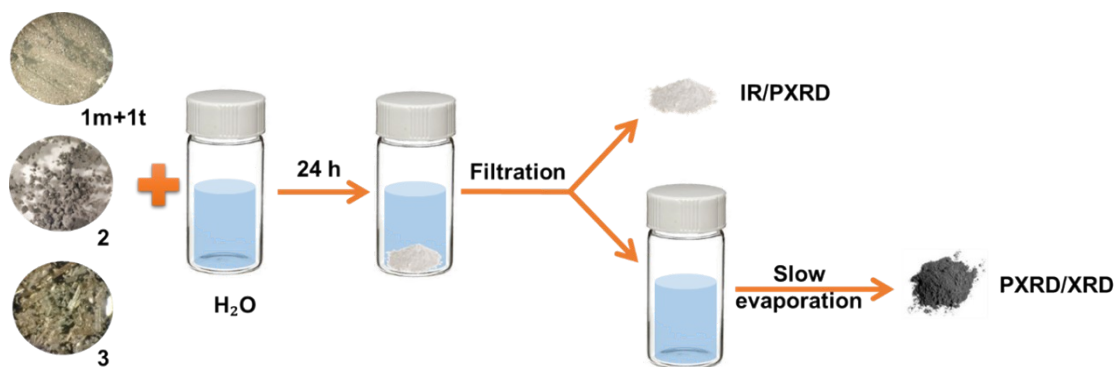

Scheme S1: Experimental process to study the water stability of the compounds.

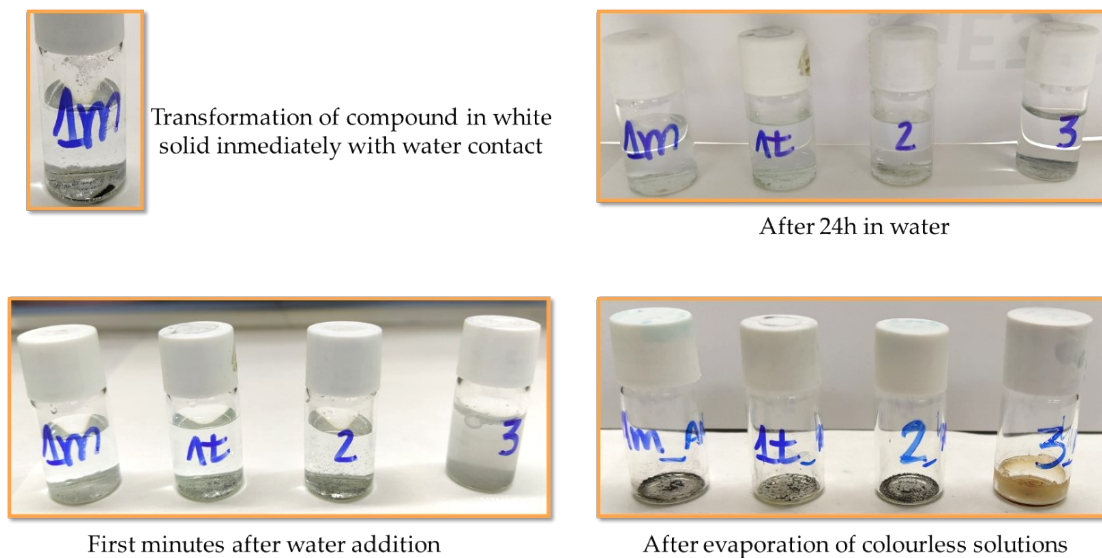

Figure S16: Images of water stability study

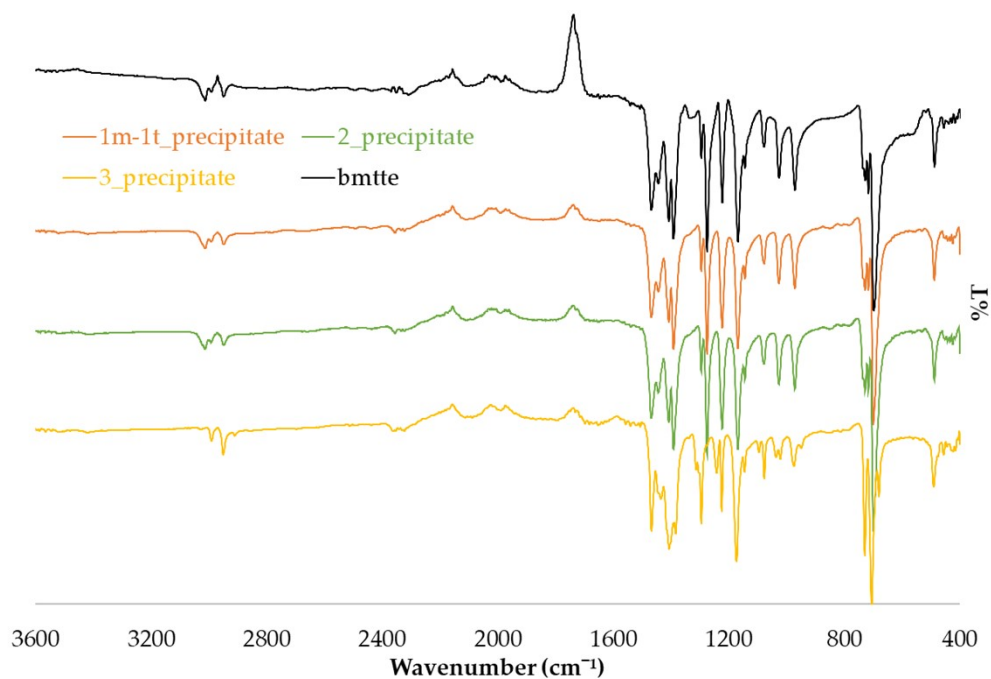

Figure S17: IR of each precipitate 1m-1t, 2 and 3 after exposure to the water together with IR of bmtte.

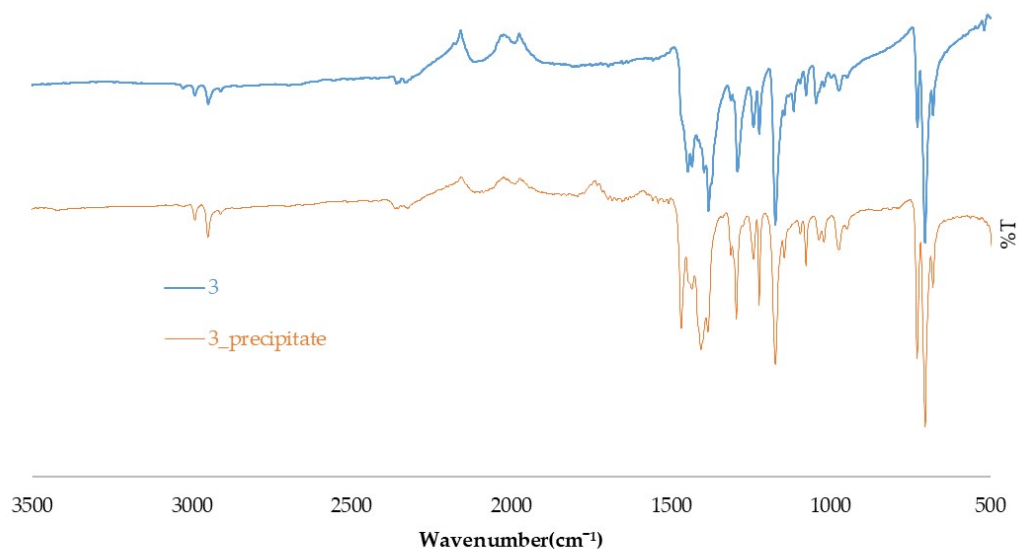

Figure S18: IR comparative of pristine **3** and precipitate after water exposure

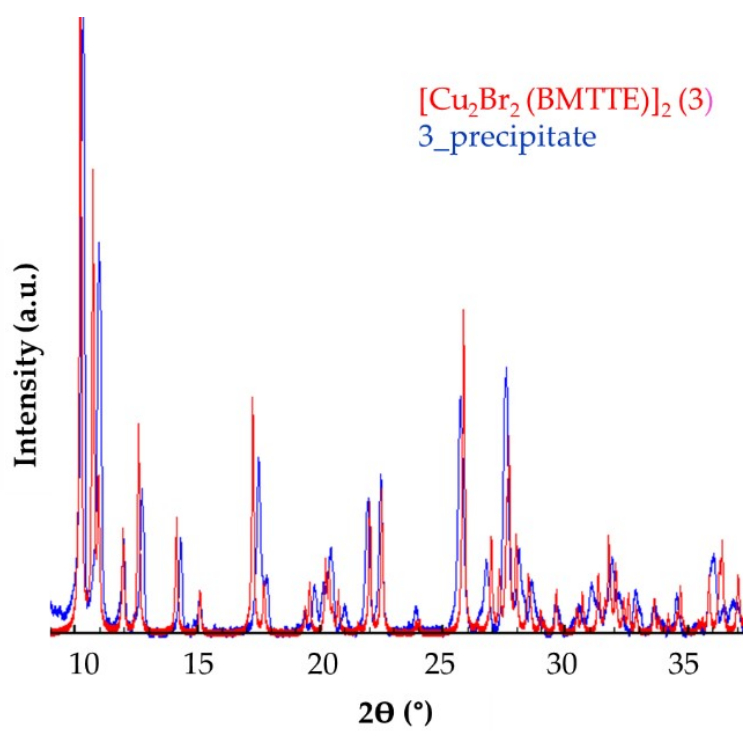

Figure S19: PXRD of **3** after water treatment compared with theoretical patterns of **3**

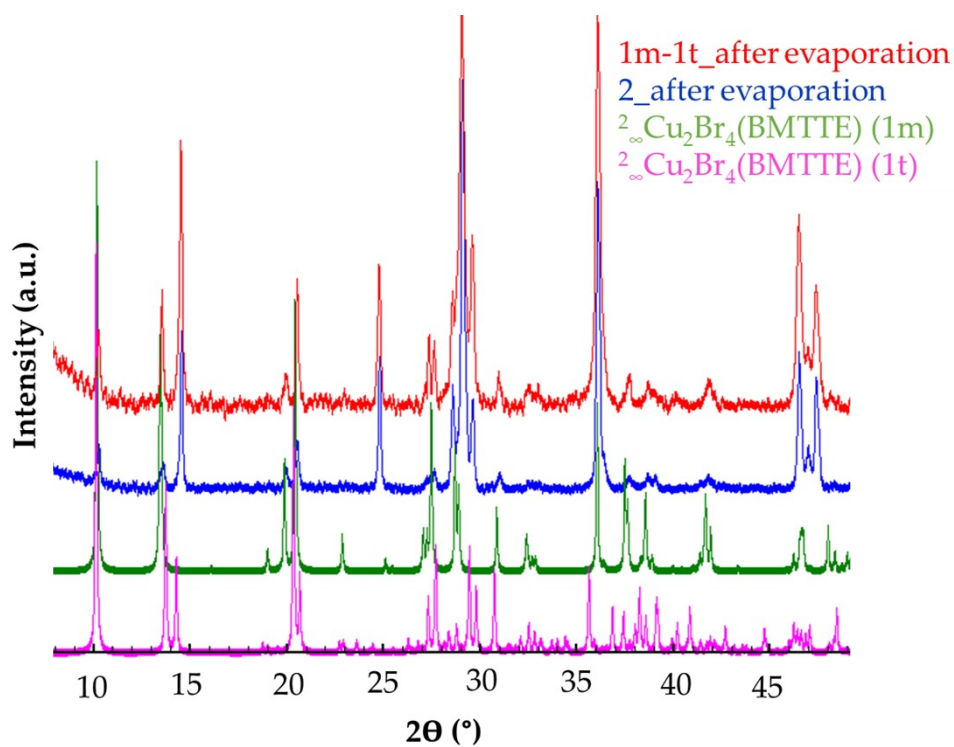

Figure S20: PXRD of each compound after water treatment compared with theoretical patterns of **1m** and **1t**. Impurities are due to the presence of  $\text{CuBr}_2$  salt.

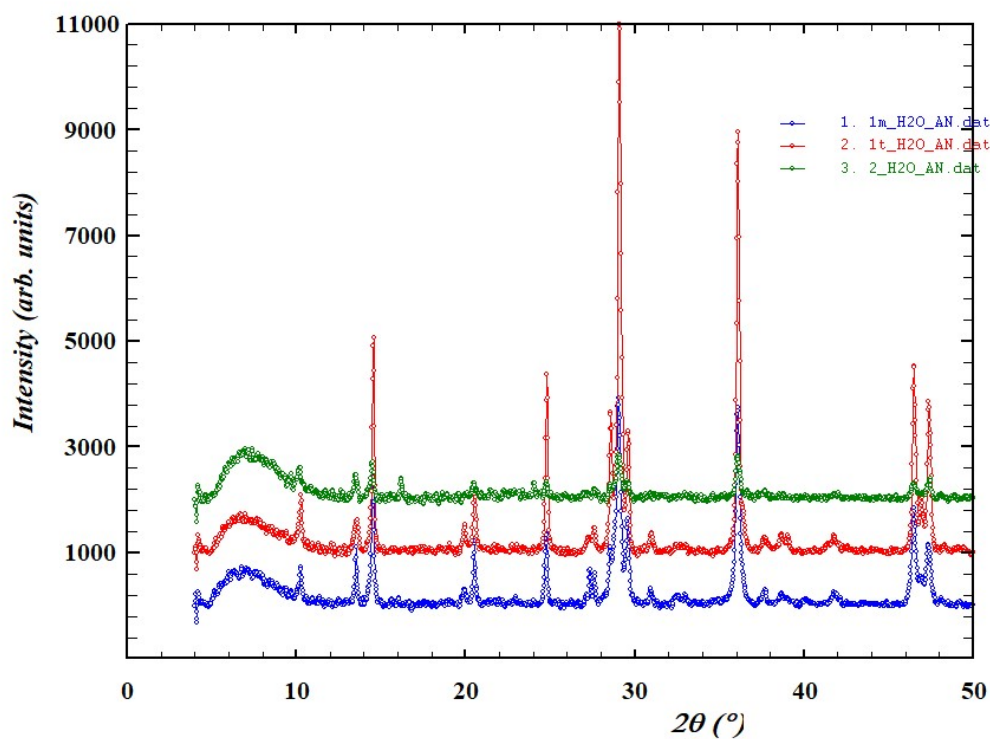

Figure S21: PXRD of resulting powder from **1m**, **1t** and **2** after water treatment.

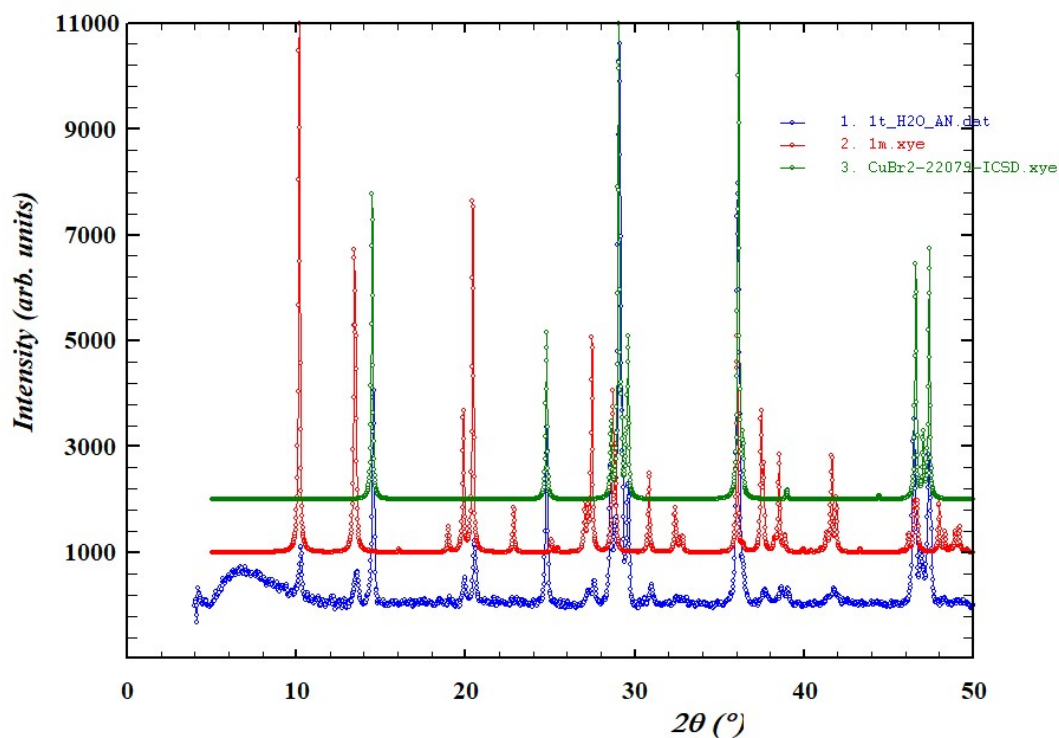

Figure S22: PXRD of **1t** after water treatment compared with the theoretical patterns of **1m** and **CuBr<sub>2</sub>**

## 6. Reactivity of **2**

METHOD A: Reaction with an excess of metal salt precursor.

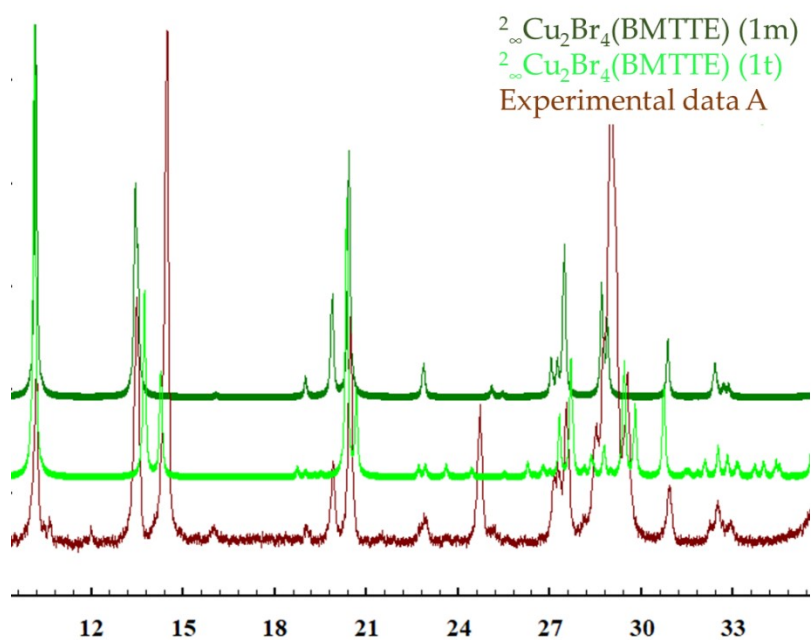

Figure S23: PXRD of reactivity of **2** in method A with theoretical of **1m** and **1t**.

Elemental analysis: Anal. Calc. for **2** + excess of **CuBr<sub>2</sub>** (2:9): 6.55%N, 4.21%C, 0.59%H, 3.75%S Found: 6.24%N, 4.54%C, 0.49%H, 4.12%S



METHOD B: Reaction with KI

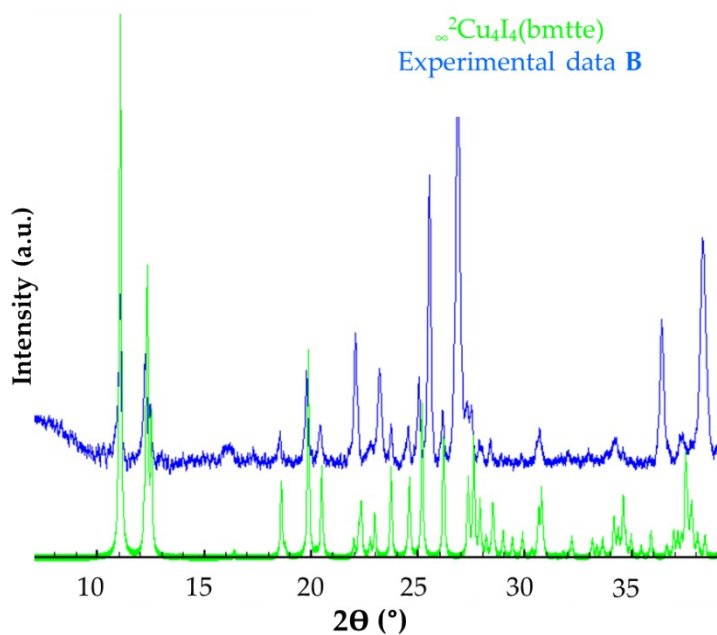

Figure S24: PXRD of reactivity of **2** in method B with theoretical of **4**.

Table S6: Elemental analysis. Experimental (Exp) and theoretical (Theo) % of N, C, H.

| Compound                                    | Carbon (wt%) |       | Nitrogen (wt%) |       | Hydrogen (wt%) |      |
|---------------------------------------------|--------------|-------|----------------|-------|----------------|------|
|                                             | Exp          | Theo  | Exp            | Theo  | Exp            | Theo |
| <b>1m and 1t</b>                            | 9.71         | 10.22 | 14.91          | 15.89 | 1.25           | 1.43 |
| <b>2</b>                                    | 14.98        | 14.03 | 22.62          | 21.82 | 2.04           | 1.96 |
| <b>3</b>                                    | 13.73        | 13.22 | 20.97          | 20.55 | 1.72           | 1.85 |
| <b>4</b>                                    | 7.21         | 7.08  | 11.09          | 11.01 | 1.01           | 0.99 |
| <b>2 + excess of CuBr<sub>2</sub> (2:9)</b> | 4.54         | 4.21  | 6.24           | 6.55  | 0.49           | 0.59 |
|                                             |              |       |                |       |                |      |

## 7. Redox behaviour of compounds 2 and 3

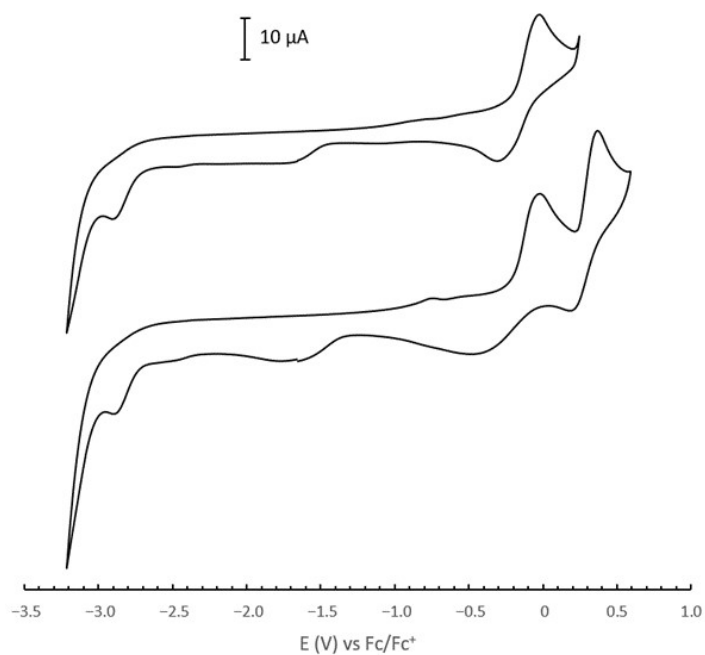

**Figure S25:** Cyclic voltammograms of 1 mM solution of complex 2 in DMSO, with 0.1 M TBAP as supporting electrolyte, at different potentials. Scan rate: 0.2 V/s.

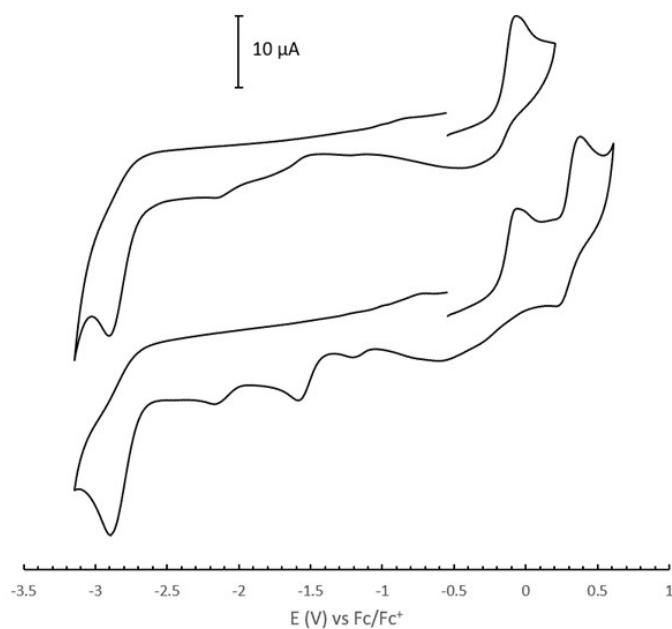

**Figure S26:** Cyclic voltammograms of 1 mM solution of complex 3 in DMSO, with 0.1 M TBAP as supporting electrolyte, at different potentials. Scan rate: 0.2 V/s.

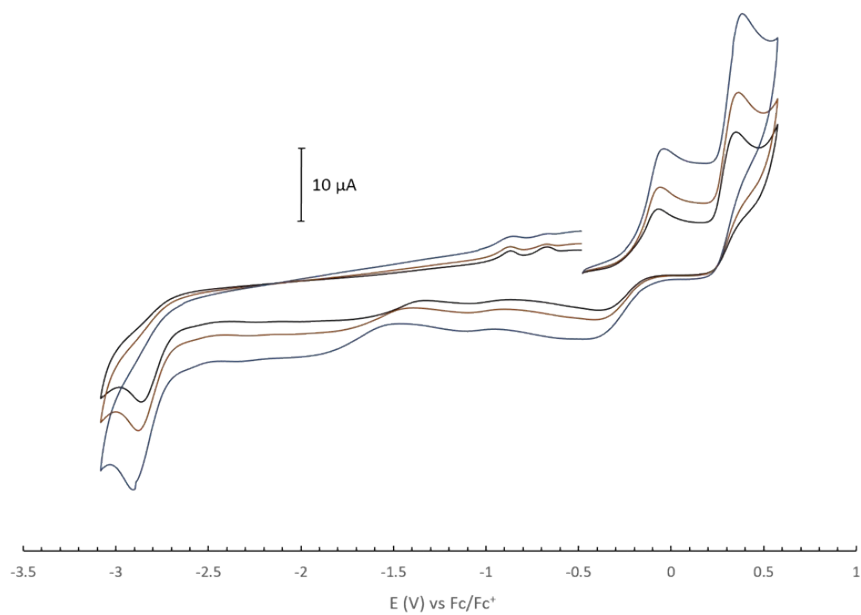

**Figure S27:** Cyclic voltammograms of 0.5 mM solutions of complex 2 in DMSO, with 0.1 M TBAP as supporting electrolyte, at different scan rates.

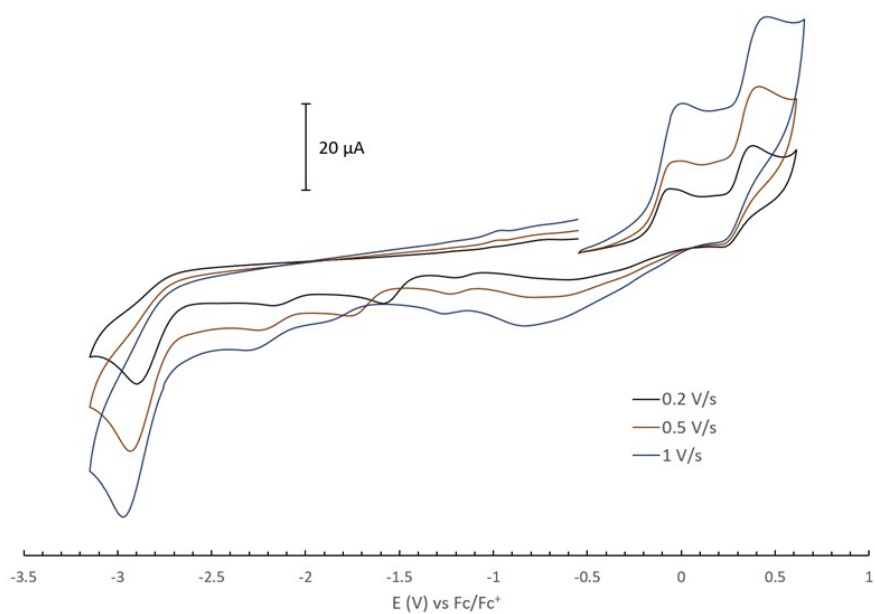

**Figure S28:** Cyclic voltammograms of 1 mM solutions of complex 3 in DMSO, at different scan rates.

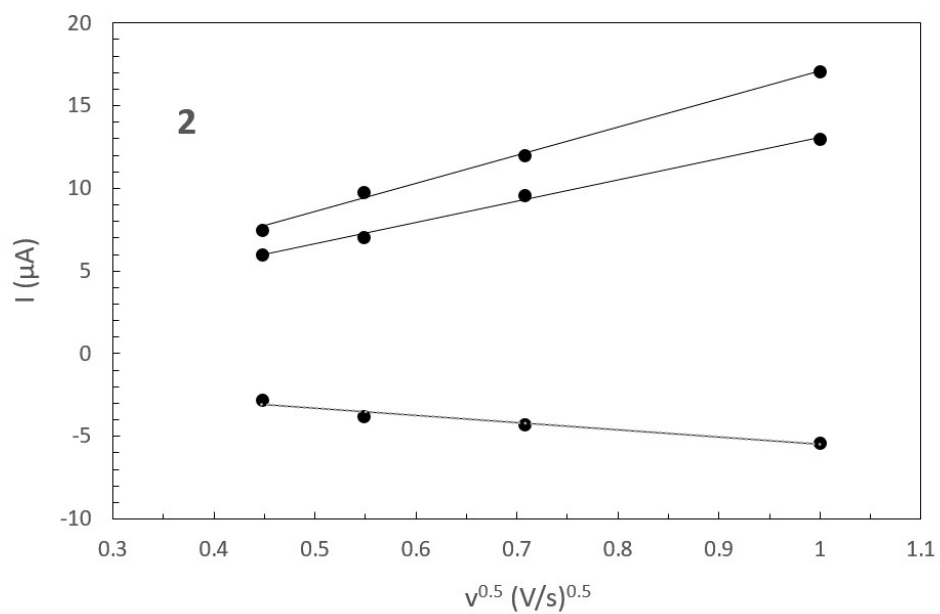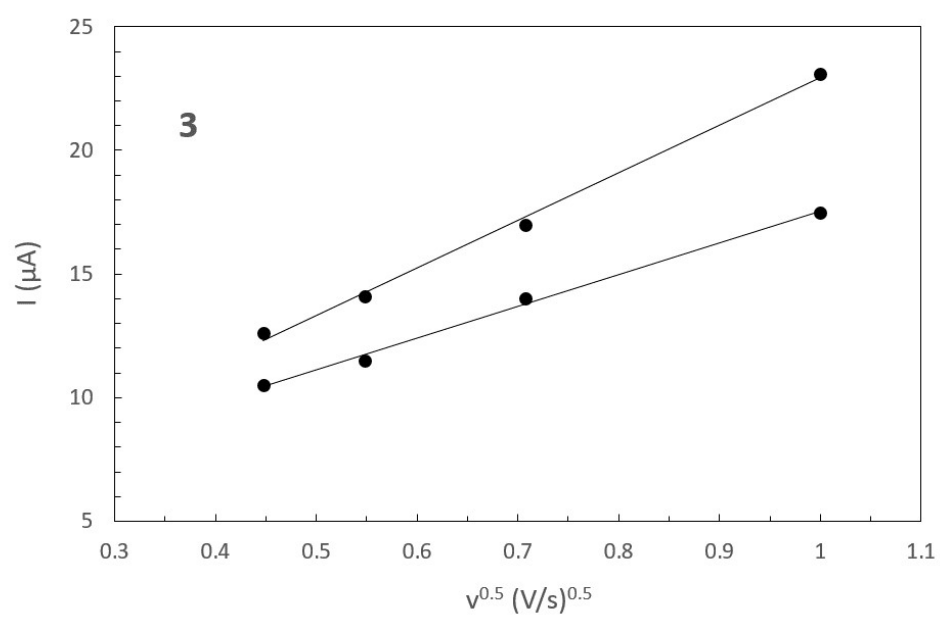

**Figure S29.** Graphical representation of the peak current vs the  $v^{1/2}$  of complex 2 and 3.
